# Supplementary material for: Cellular allostatic load is linked to increased energy expenditure and accelerated biological aging
Source: PubMed Central journal article supplement — Psychoneuroendocrinology. Author manuscript; Available in PMC 2023 Sep 27. (PMC10528419; doi:10.1016/j.psyneuen.2023.106322), 2023-06-14

Figure S1

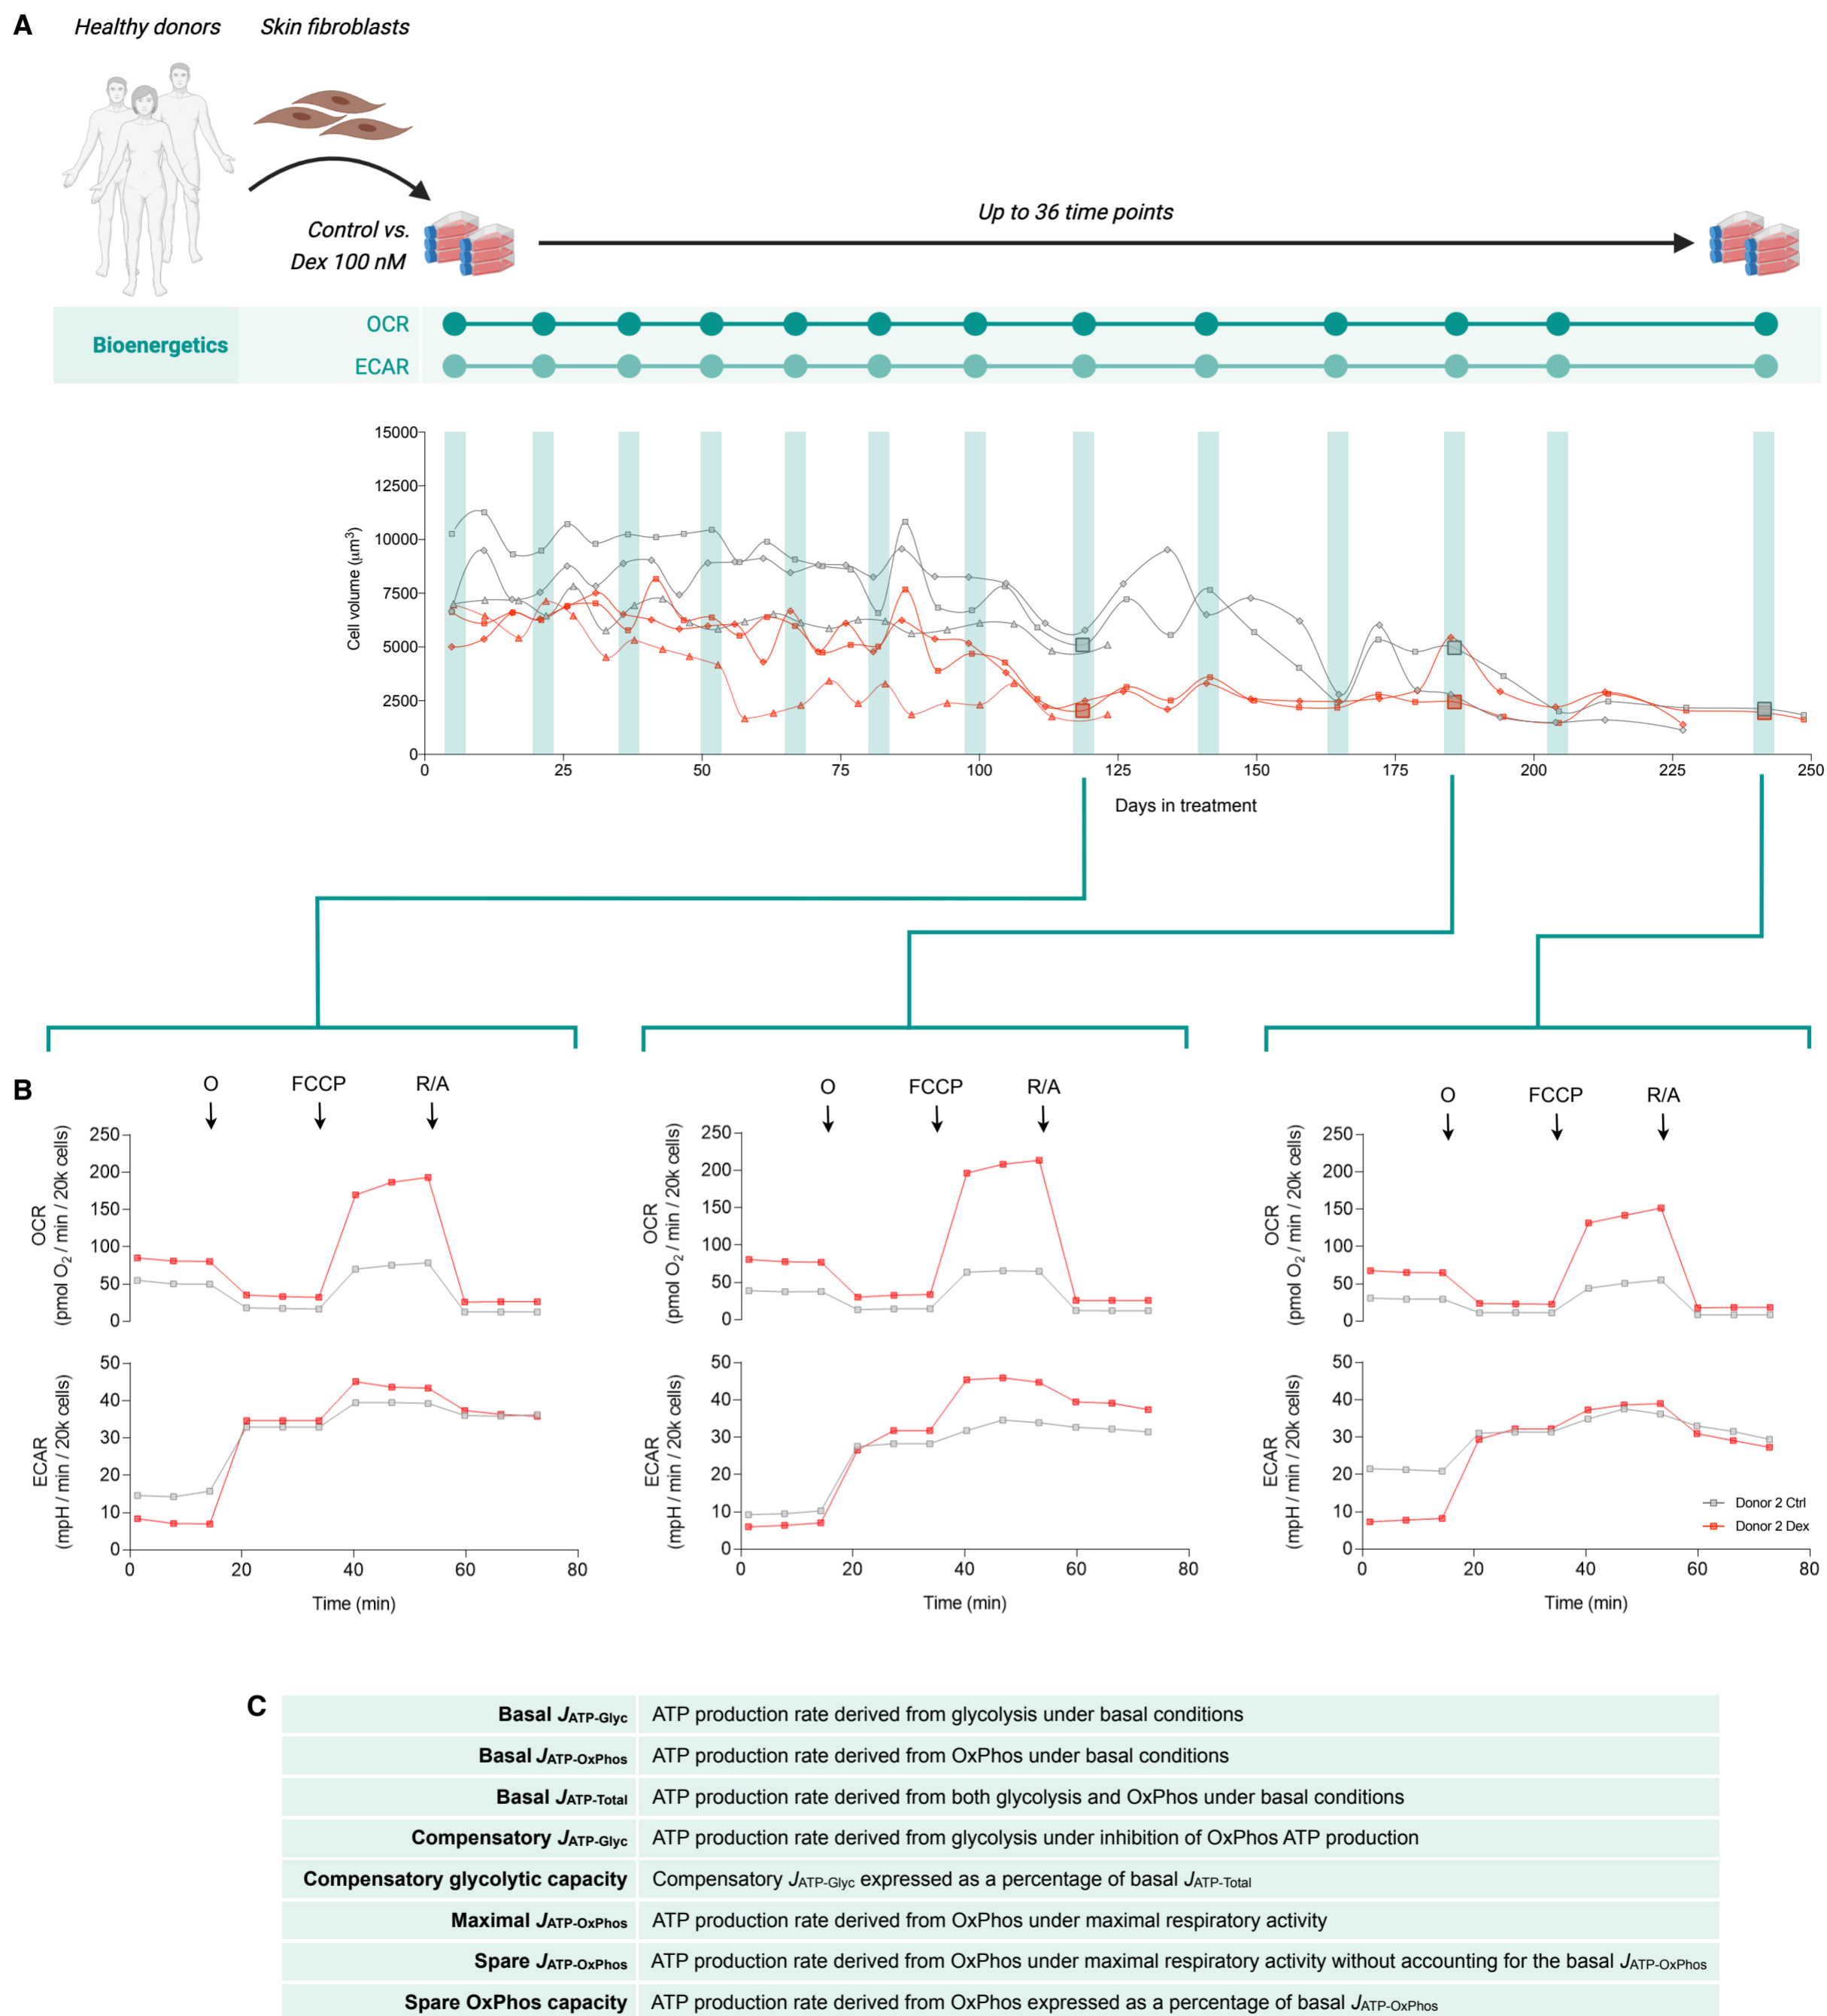

**Figure S2**

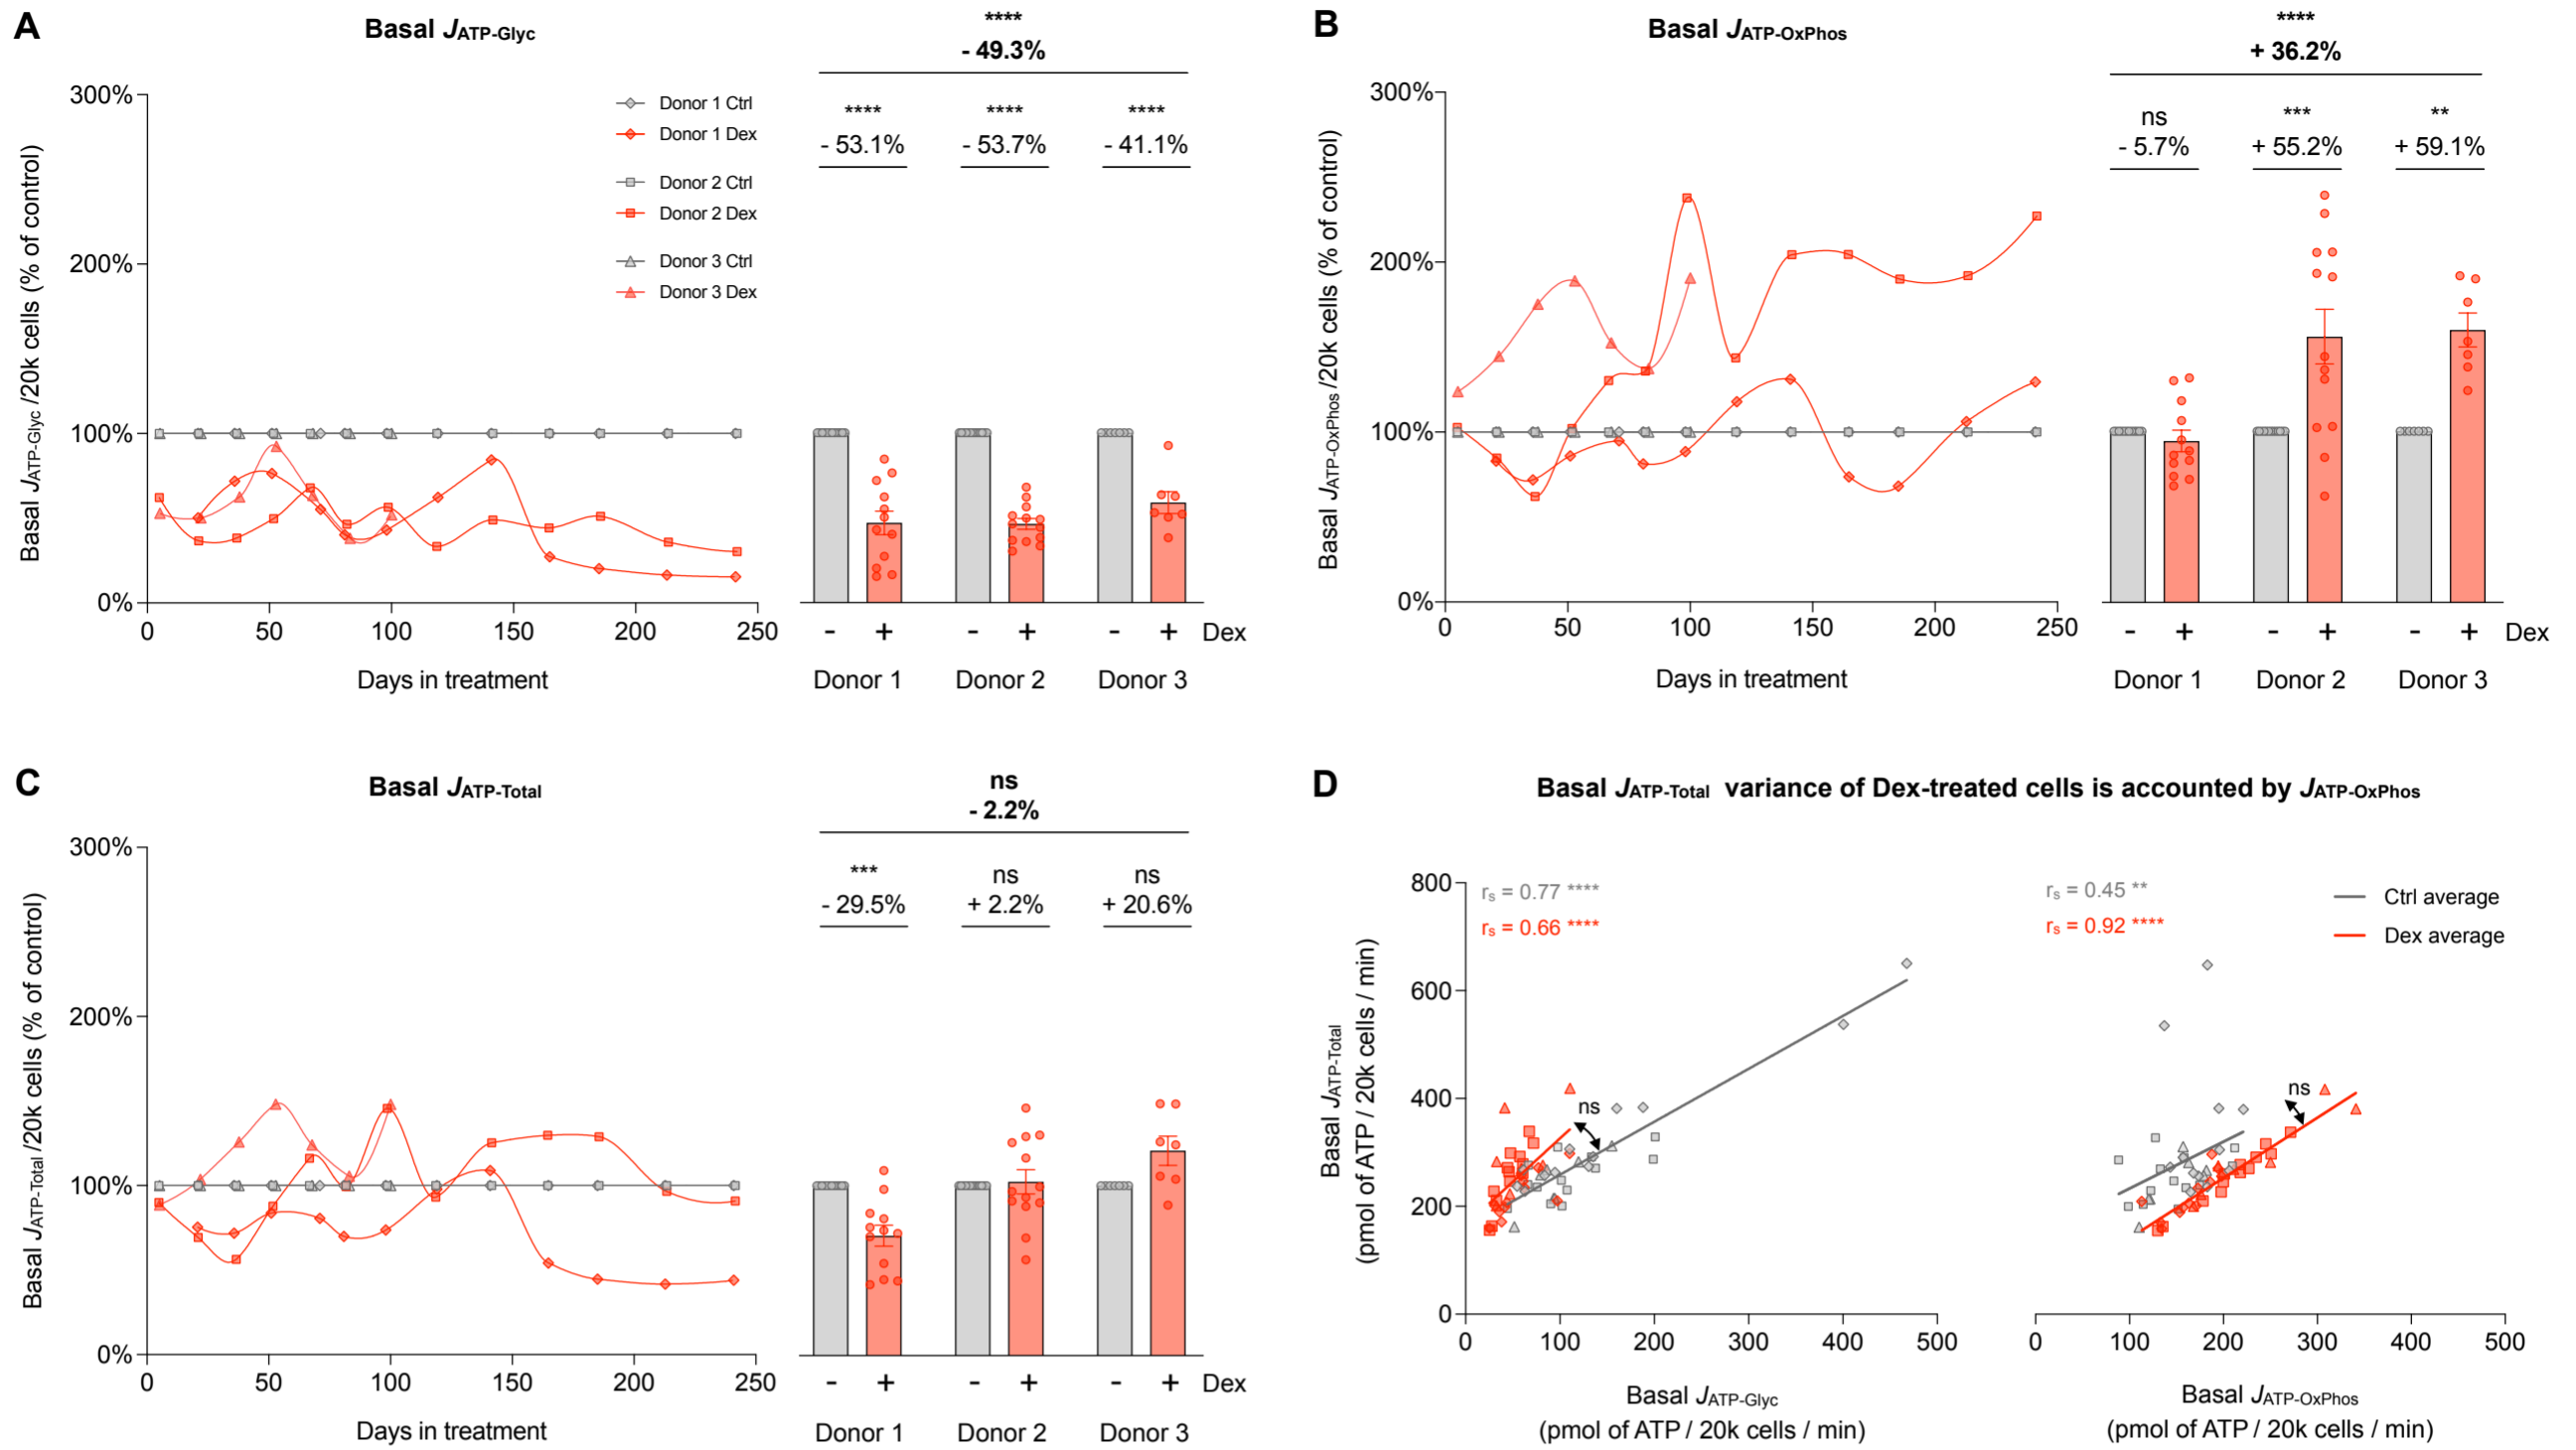

Figure S3

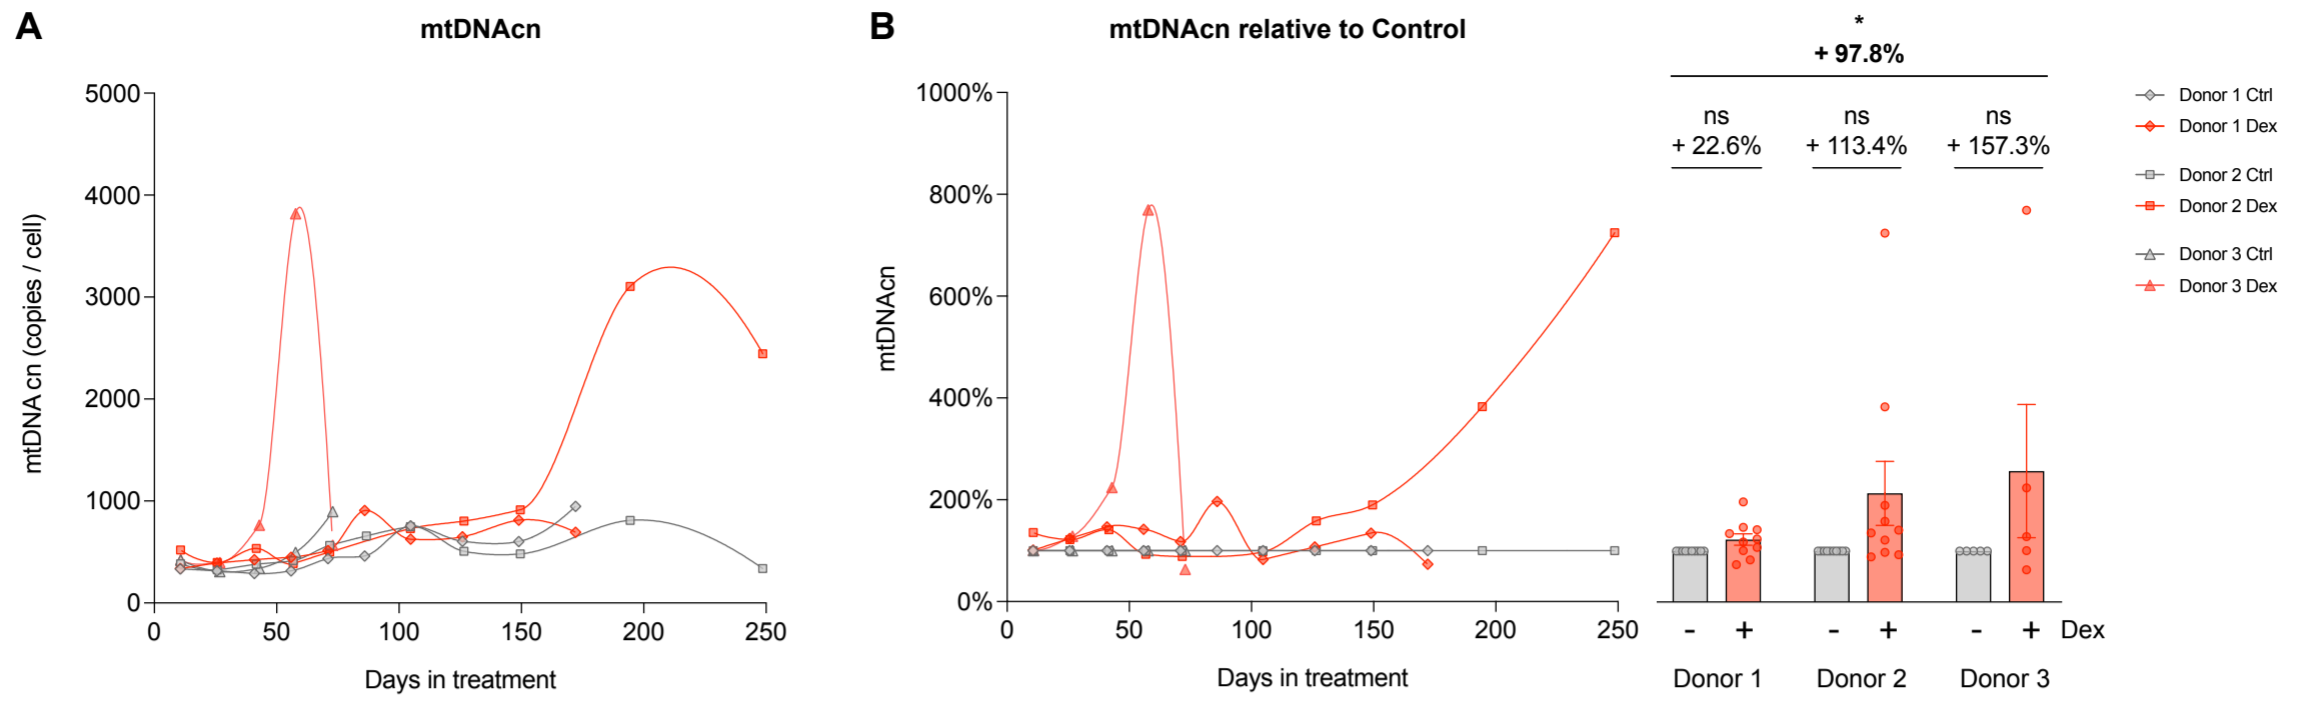

**Figure S4**

**A Glycolysis**

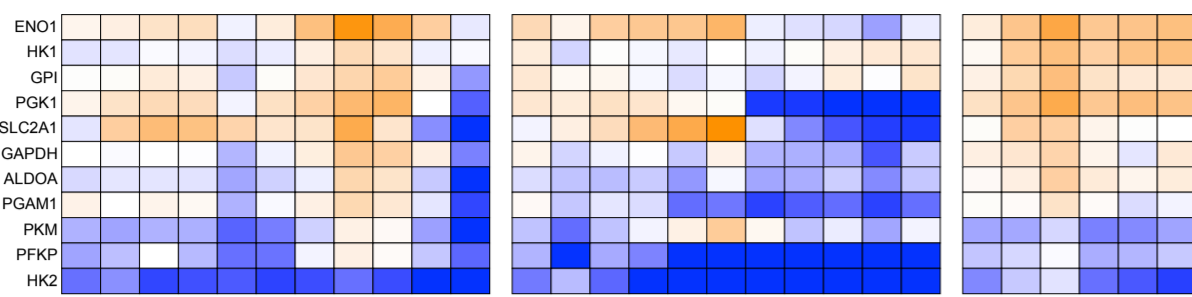

**B OxPhos**

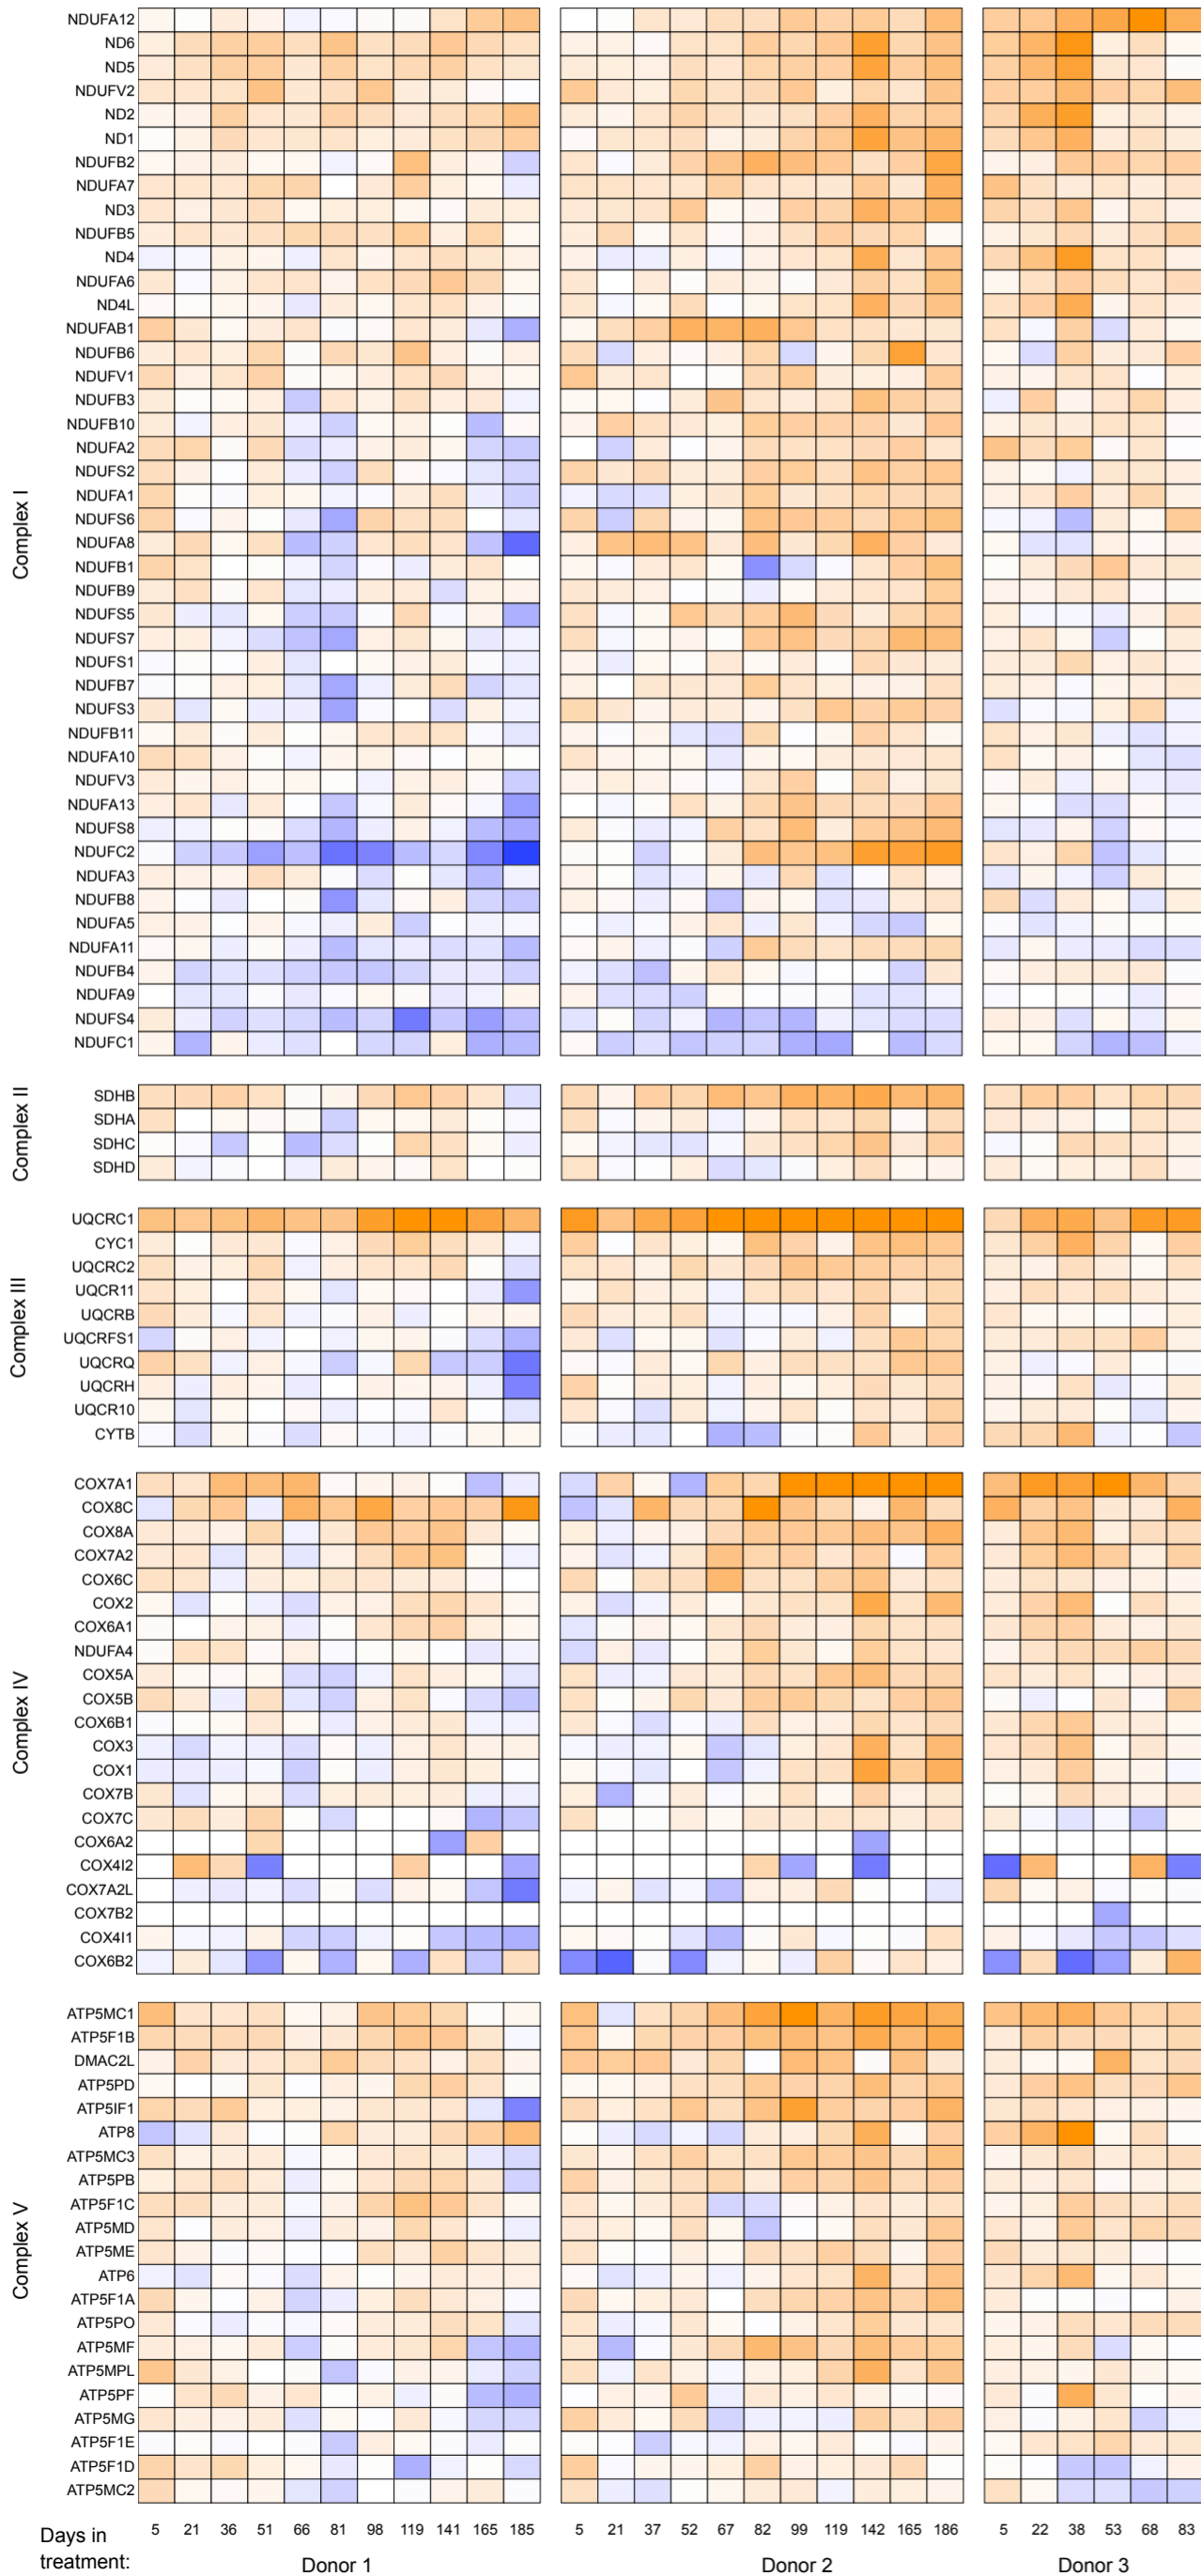

**C mtDNA maintenance**

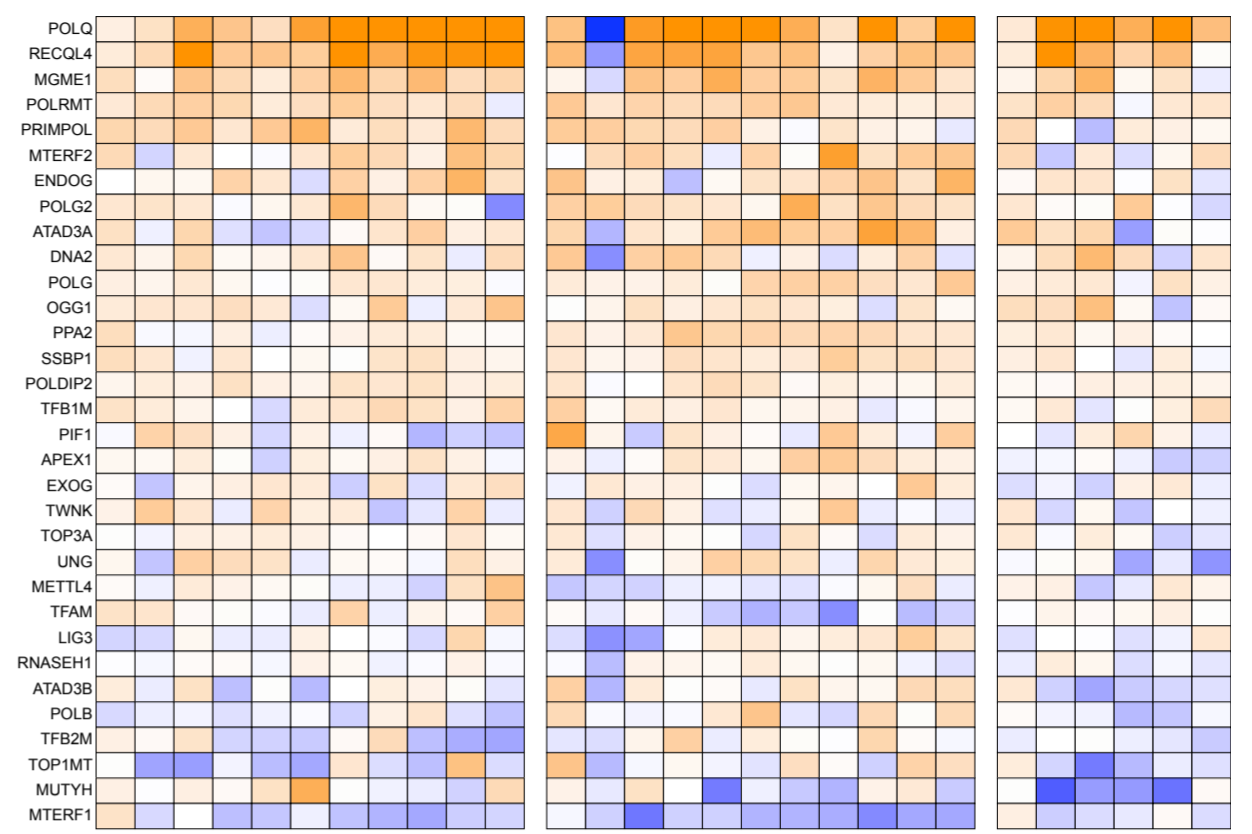

**D mtDNA replication**

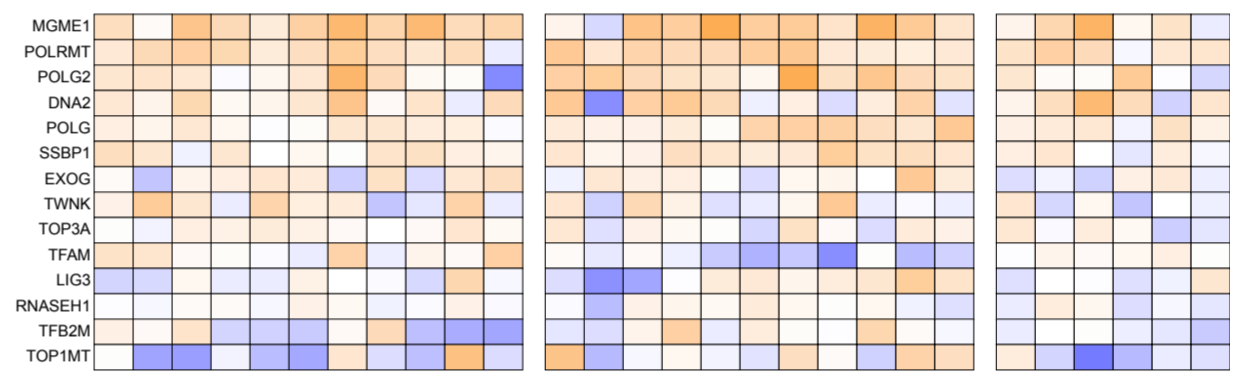

**E Mitochondrial biogenesis**

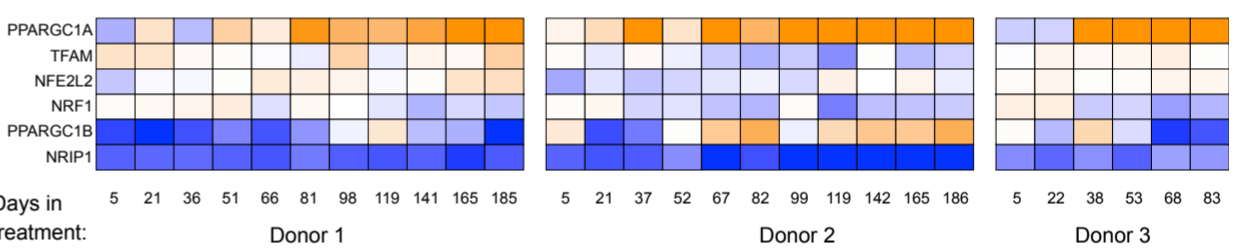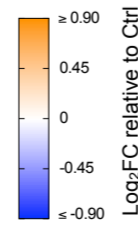

Figure S5

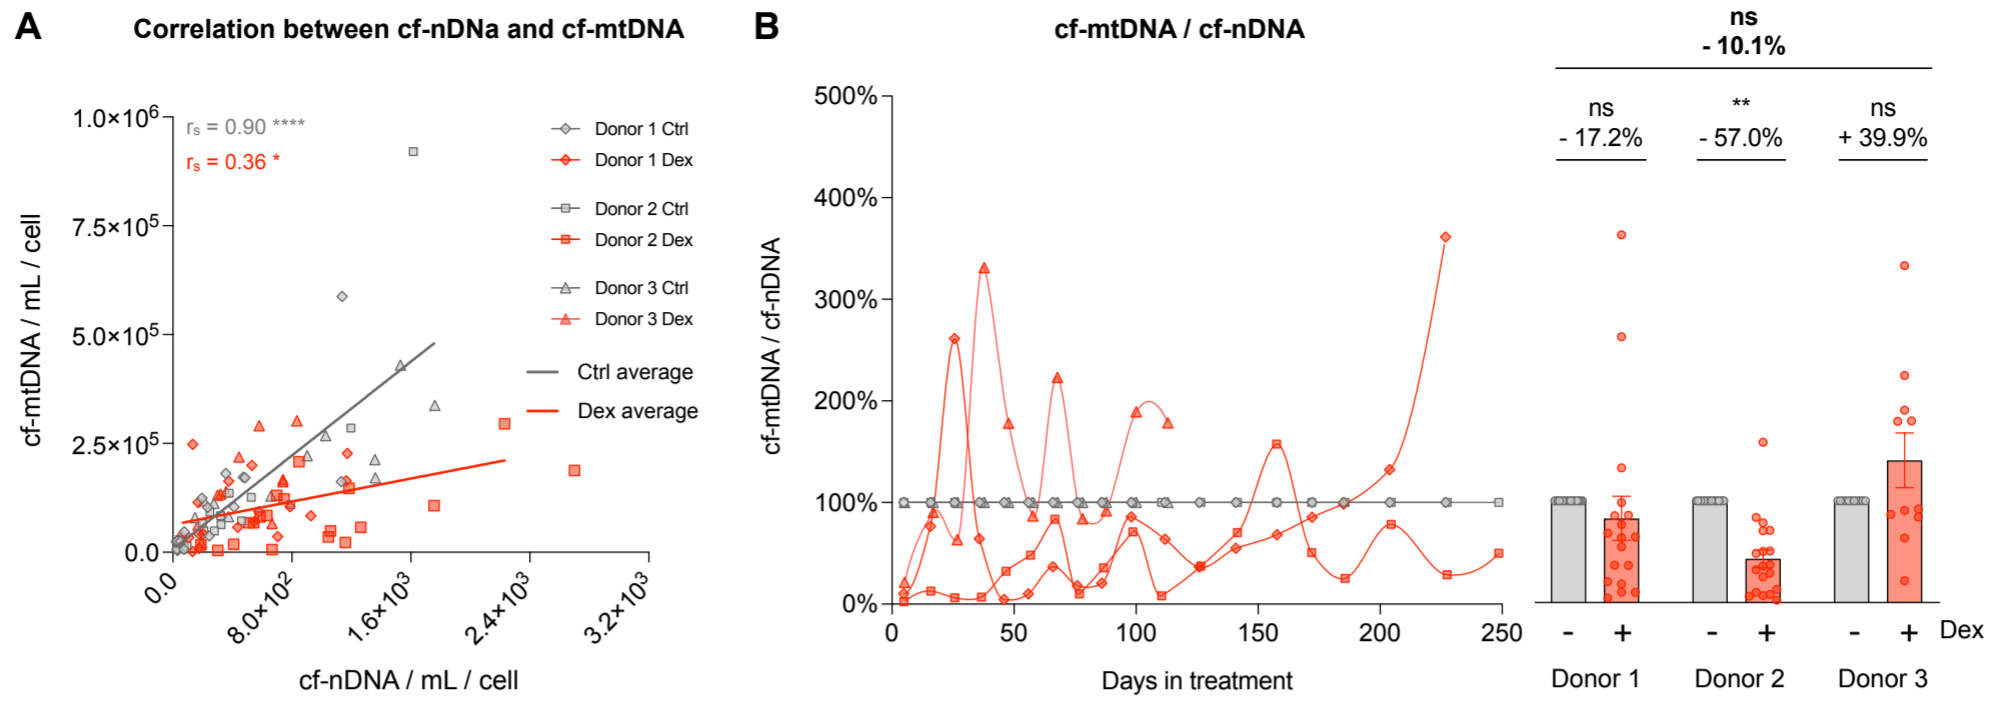

Figure S6

**A**

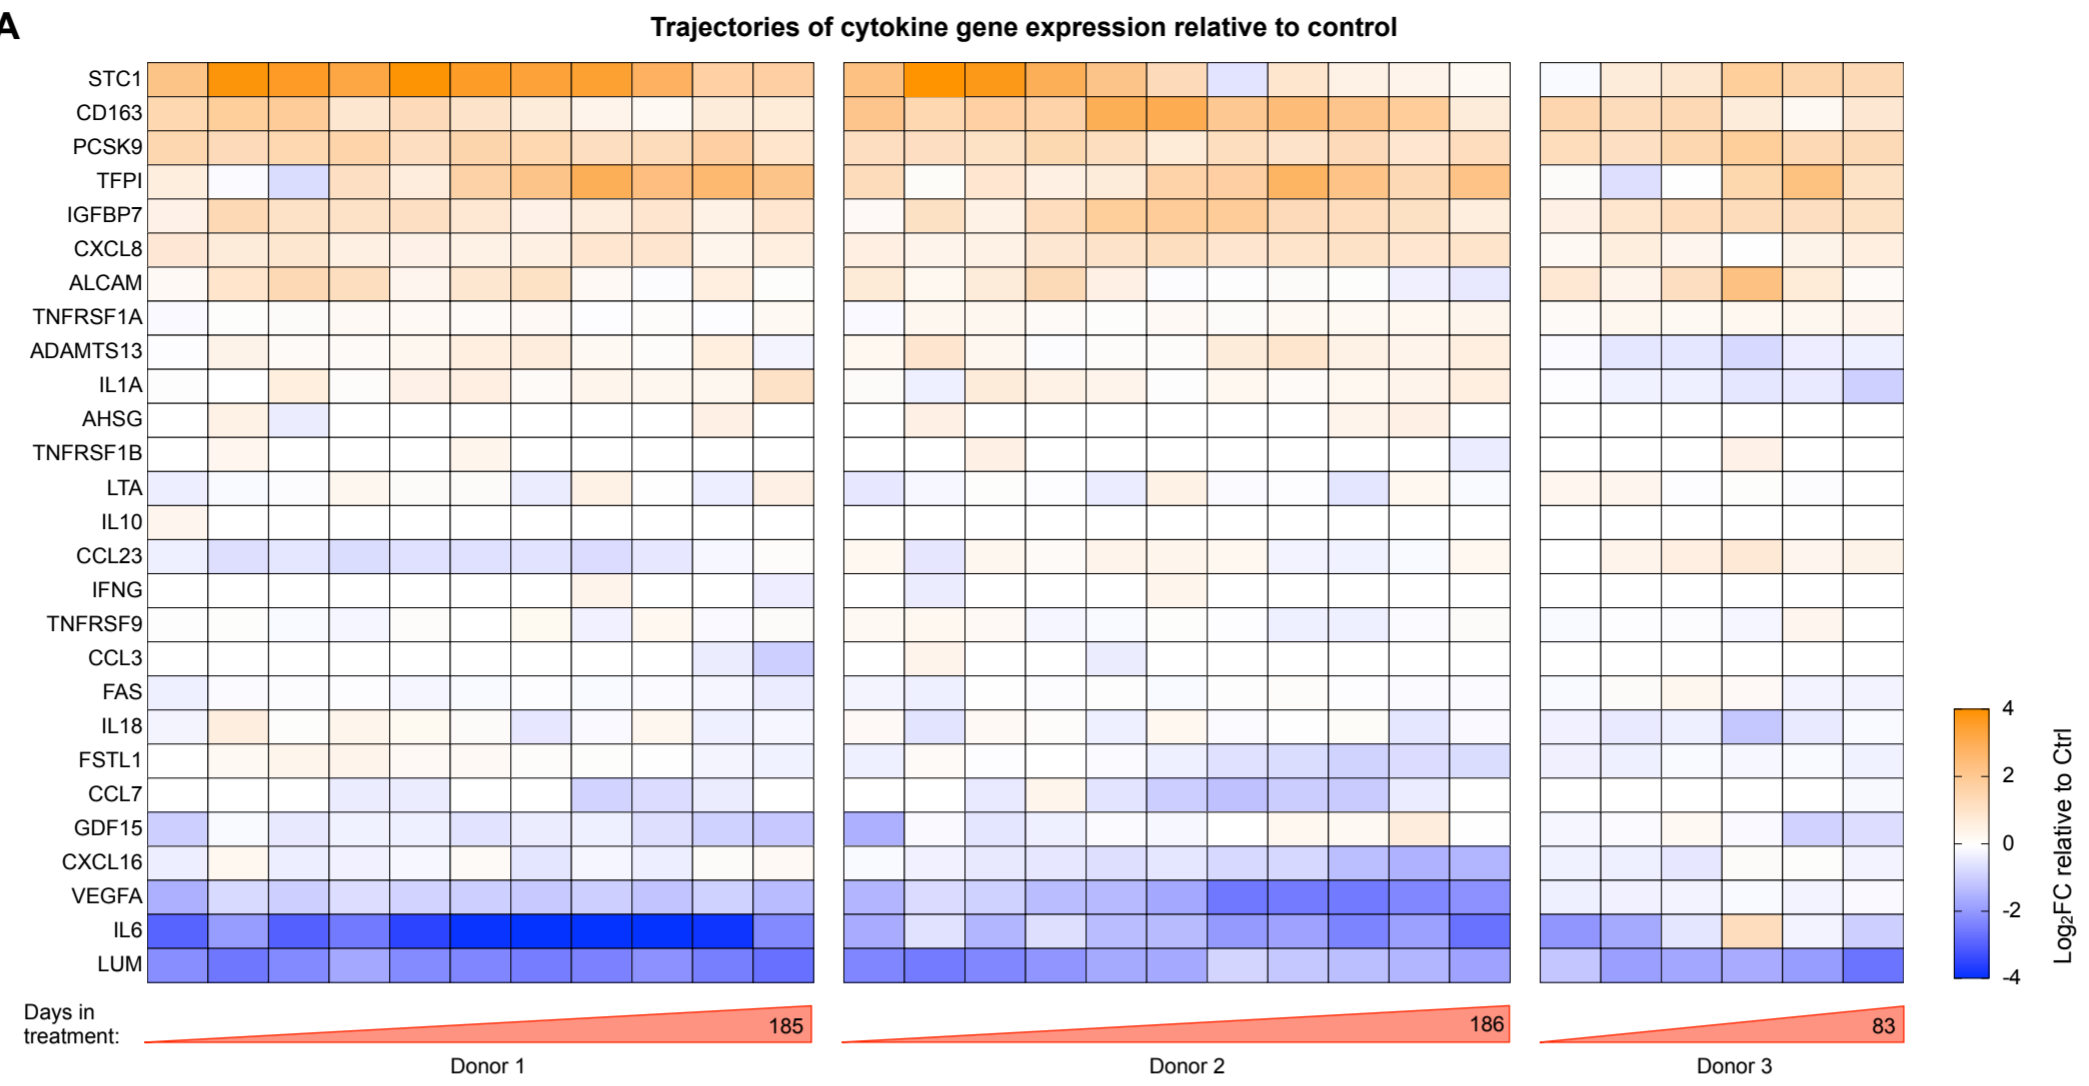

**B**

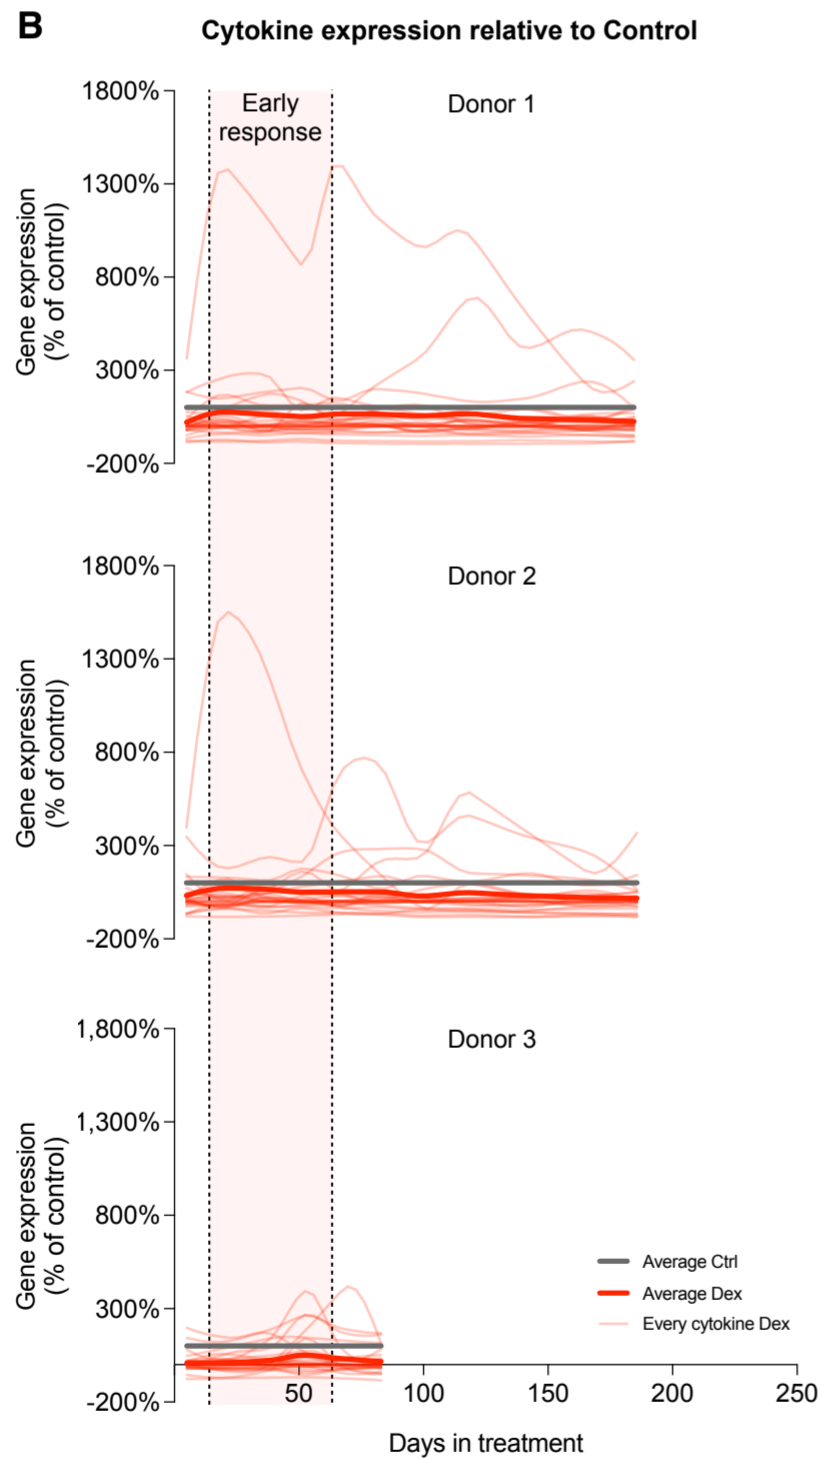

**C**

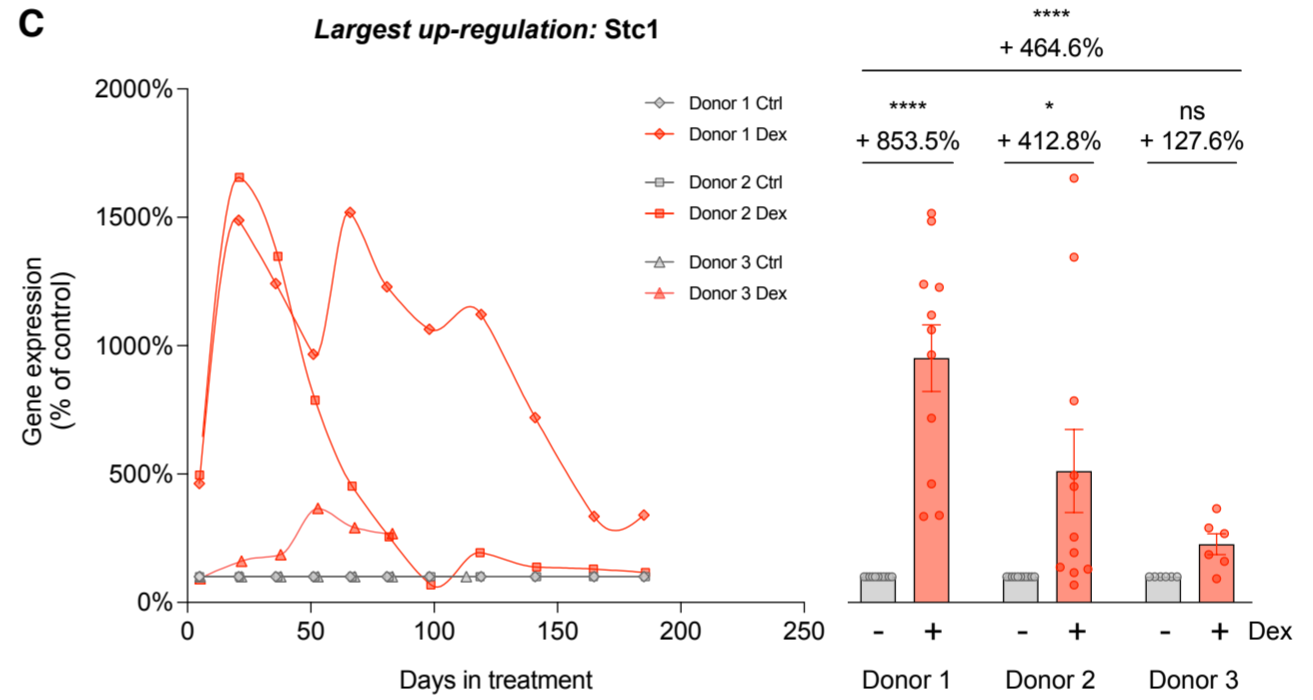

**D**

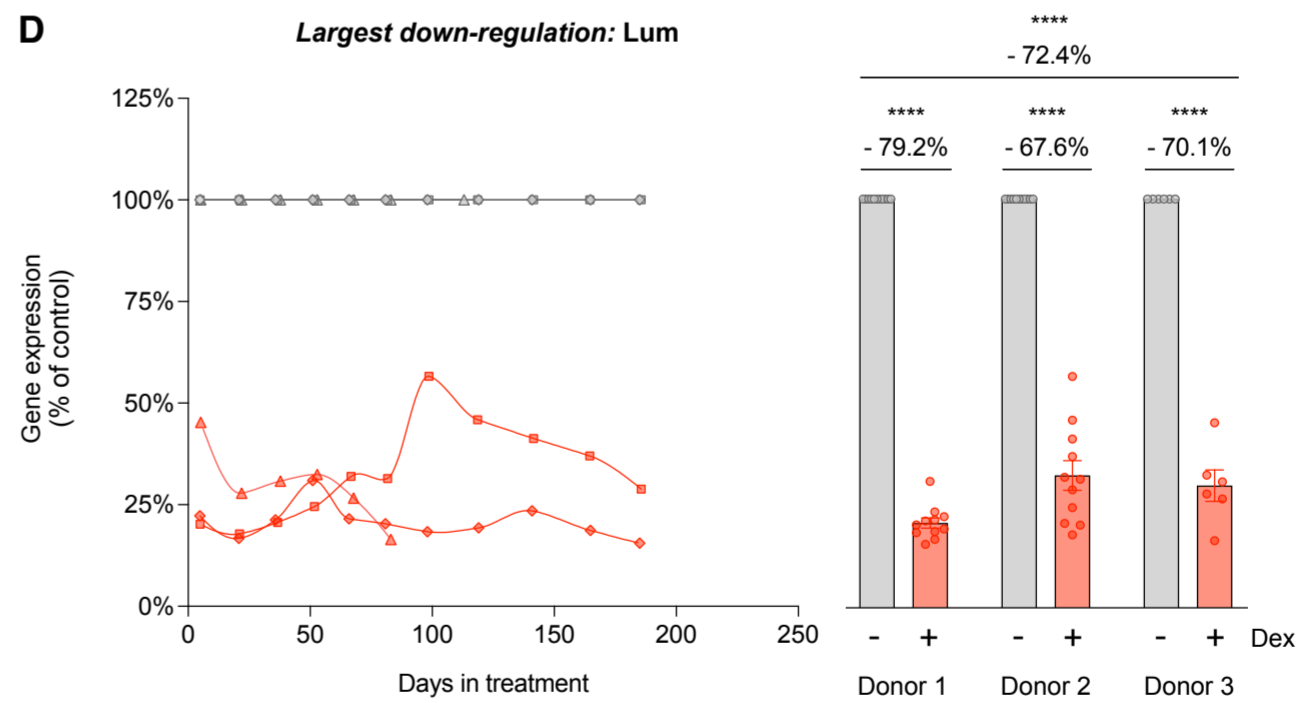

**Figure S7**

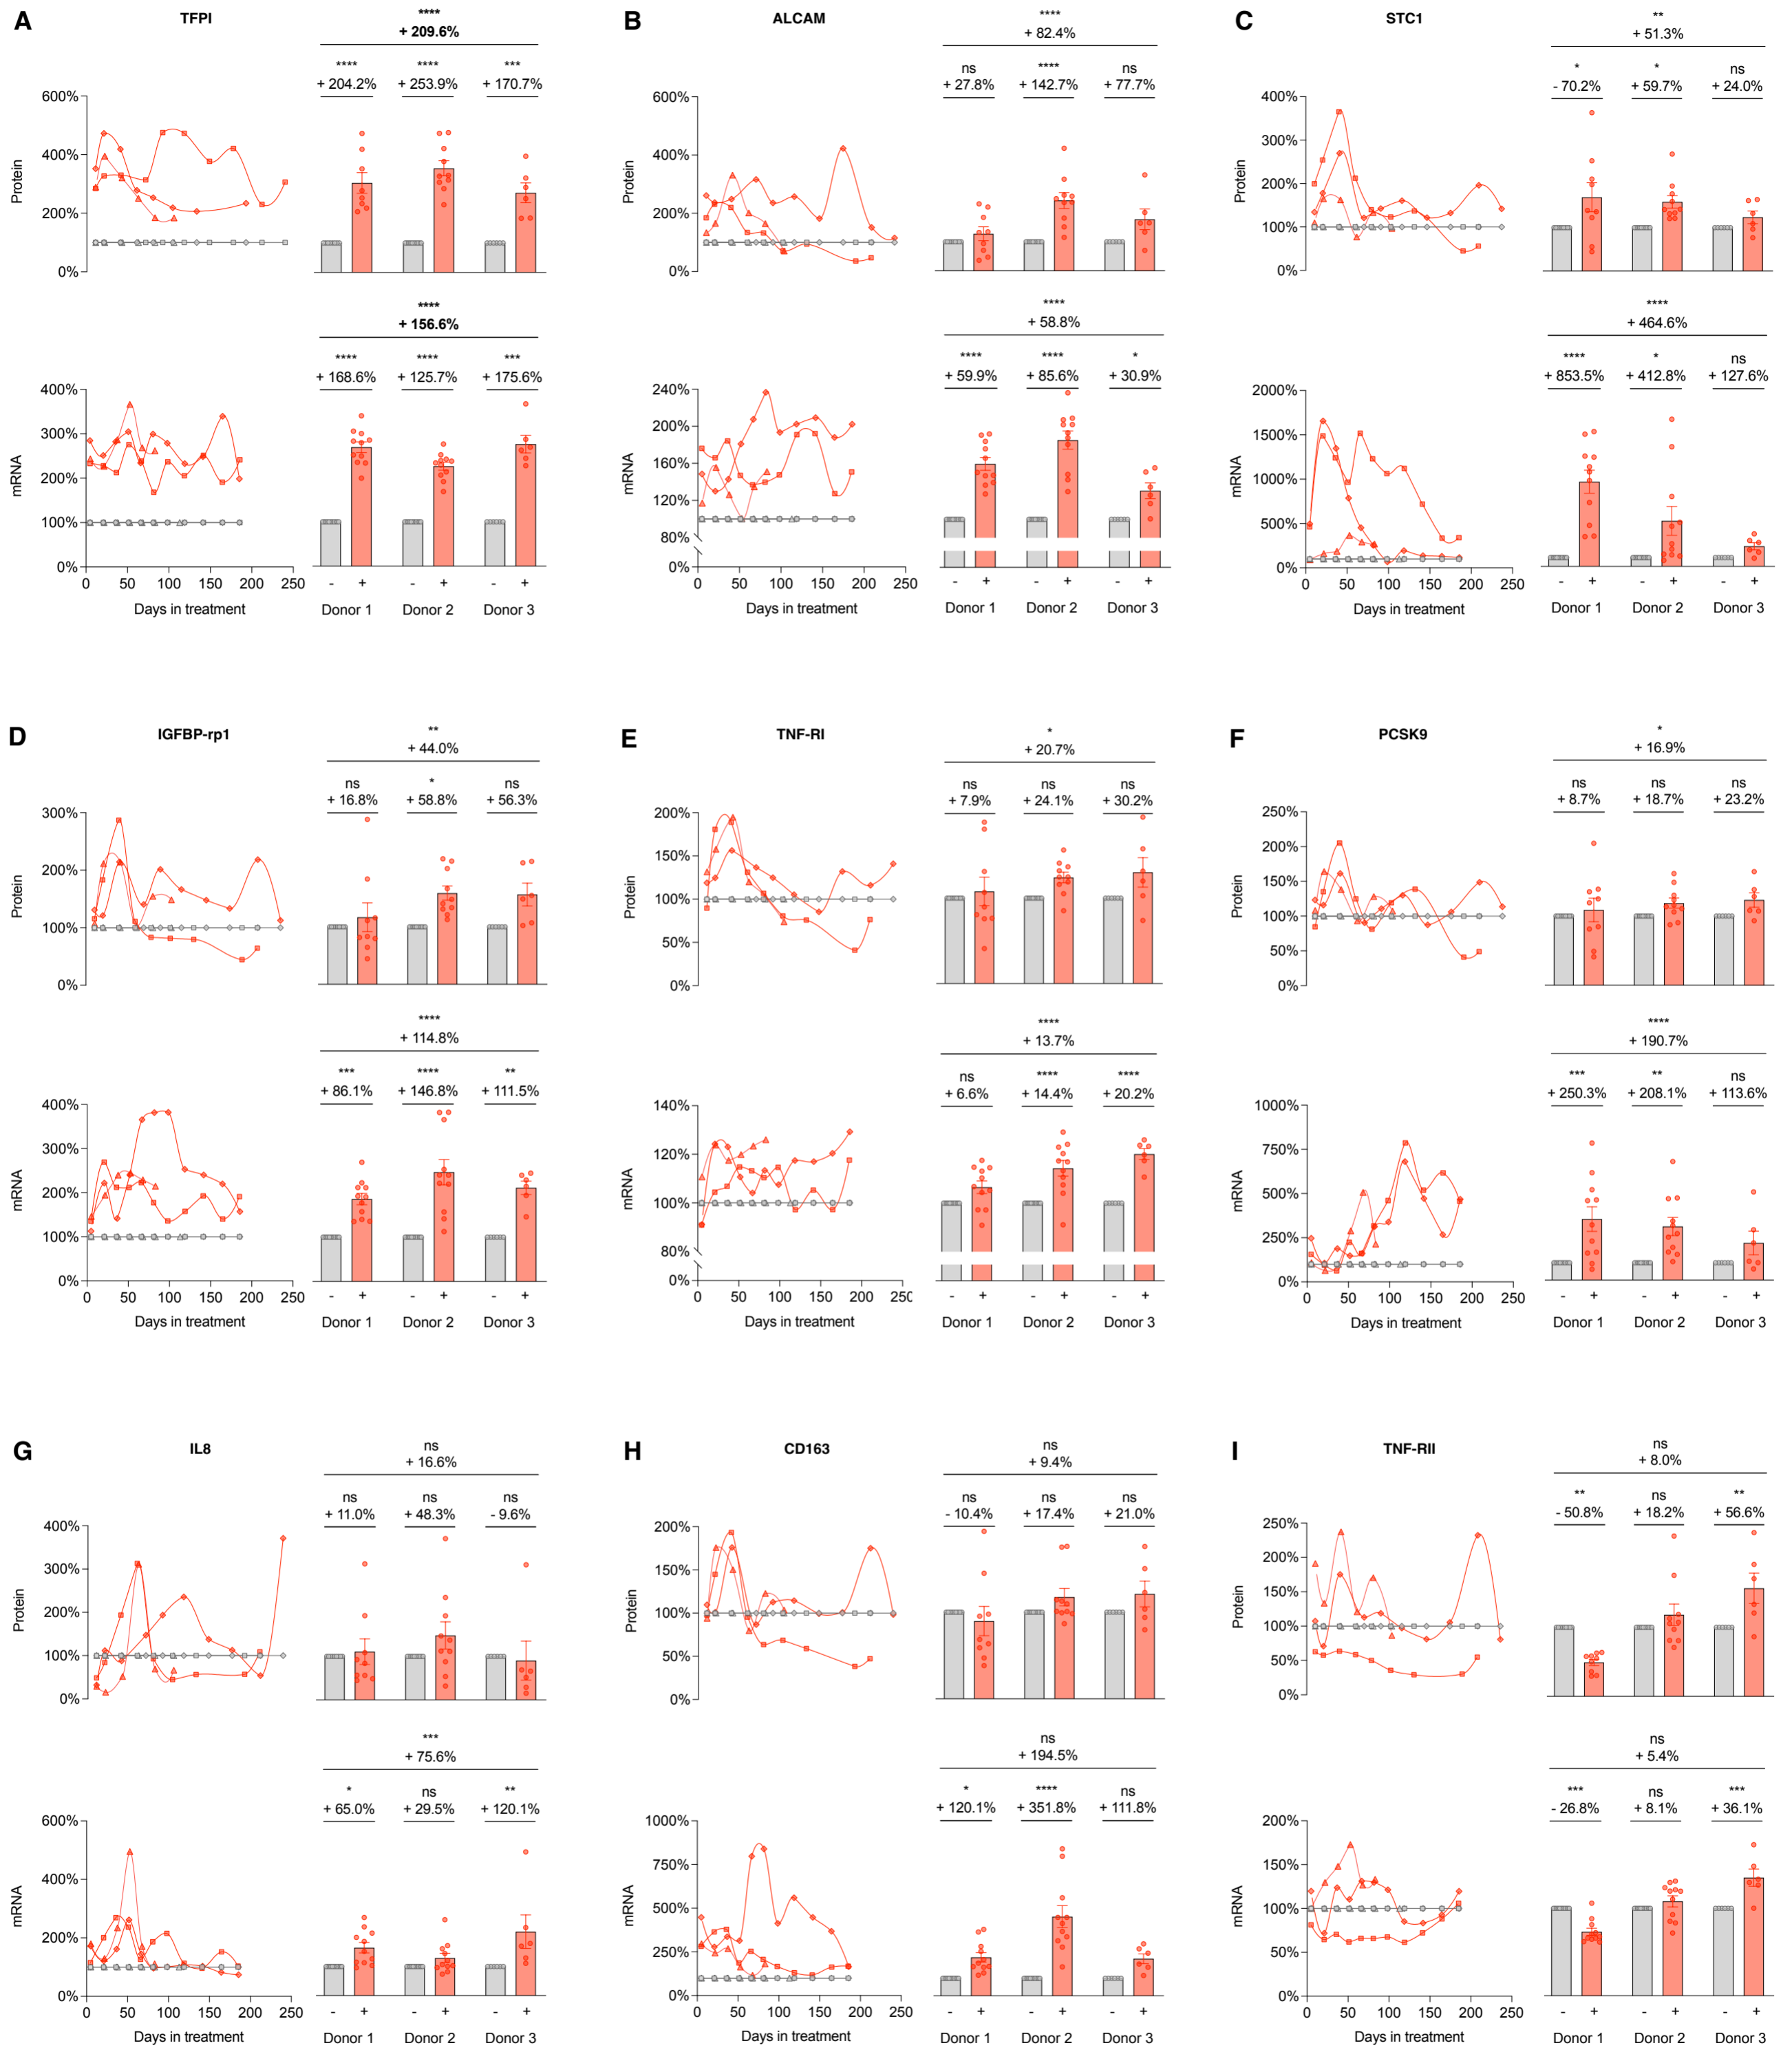

Figure S7 - Continued (2/3)

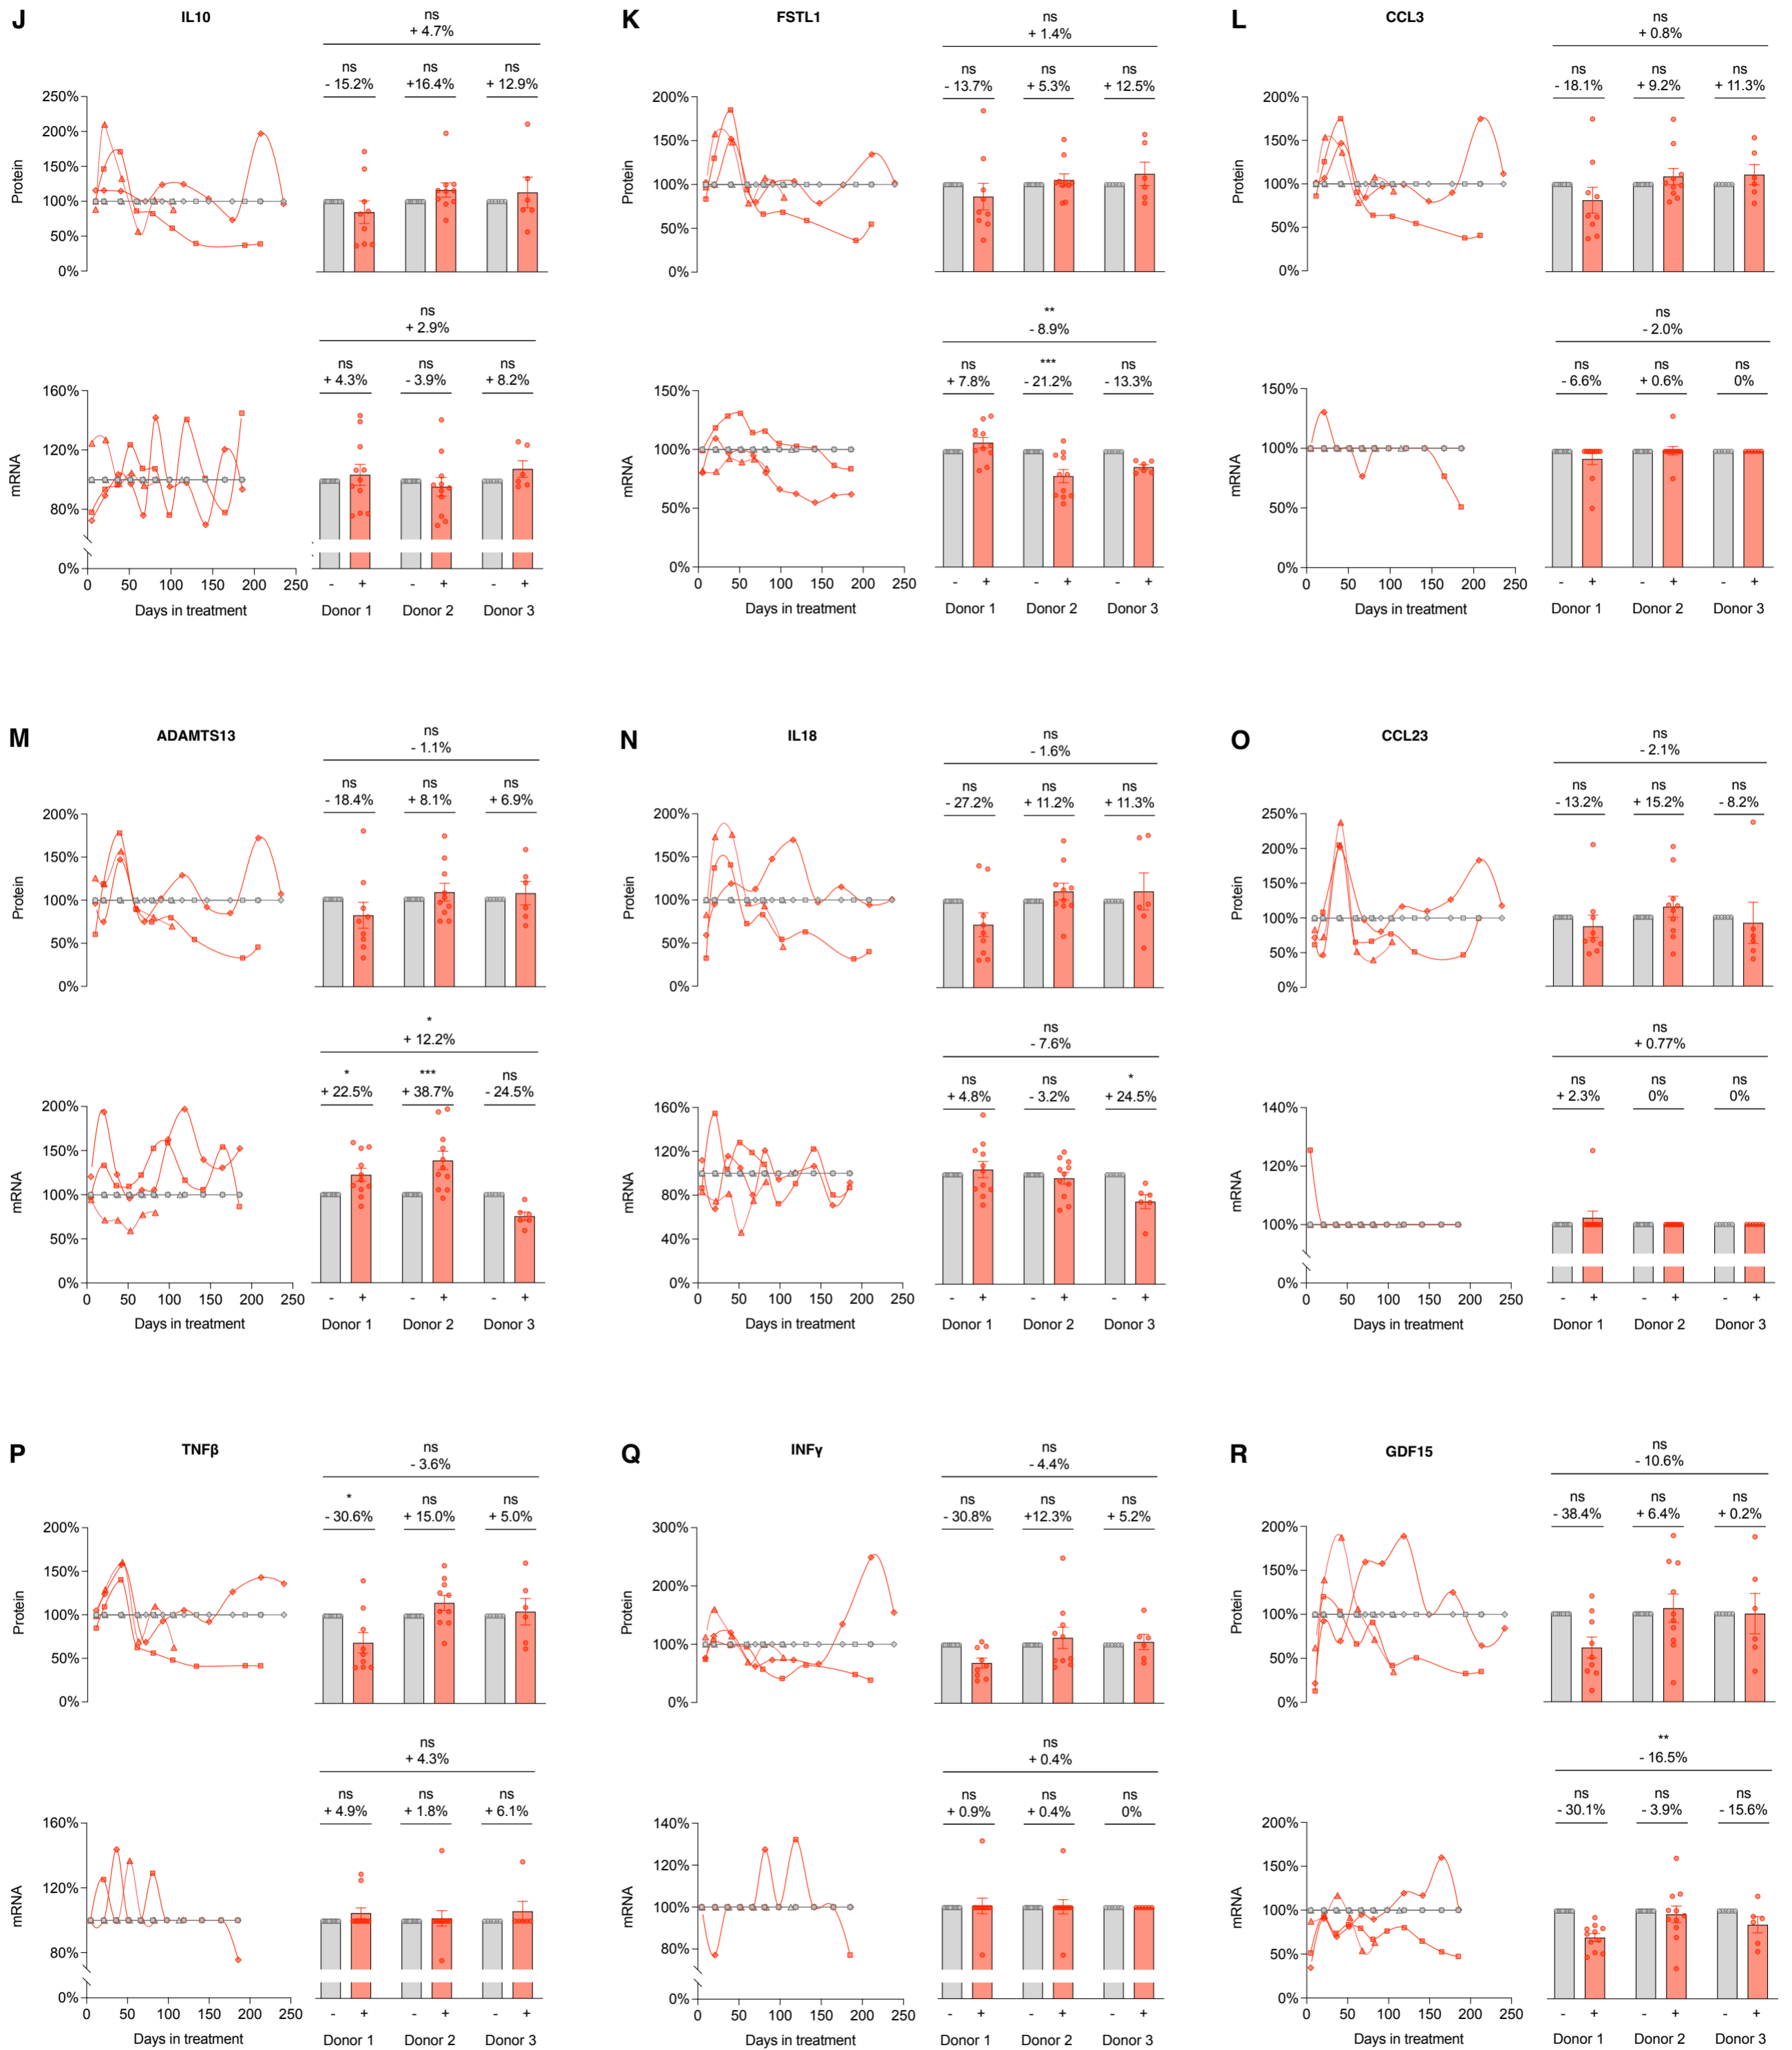



Figure S7 - Continued (3/3)

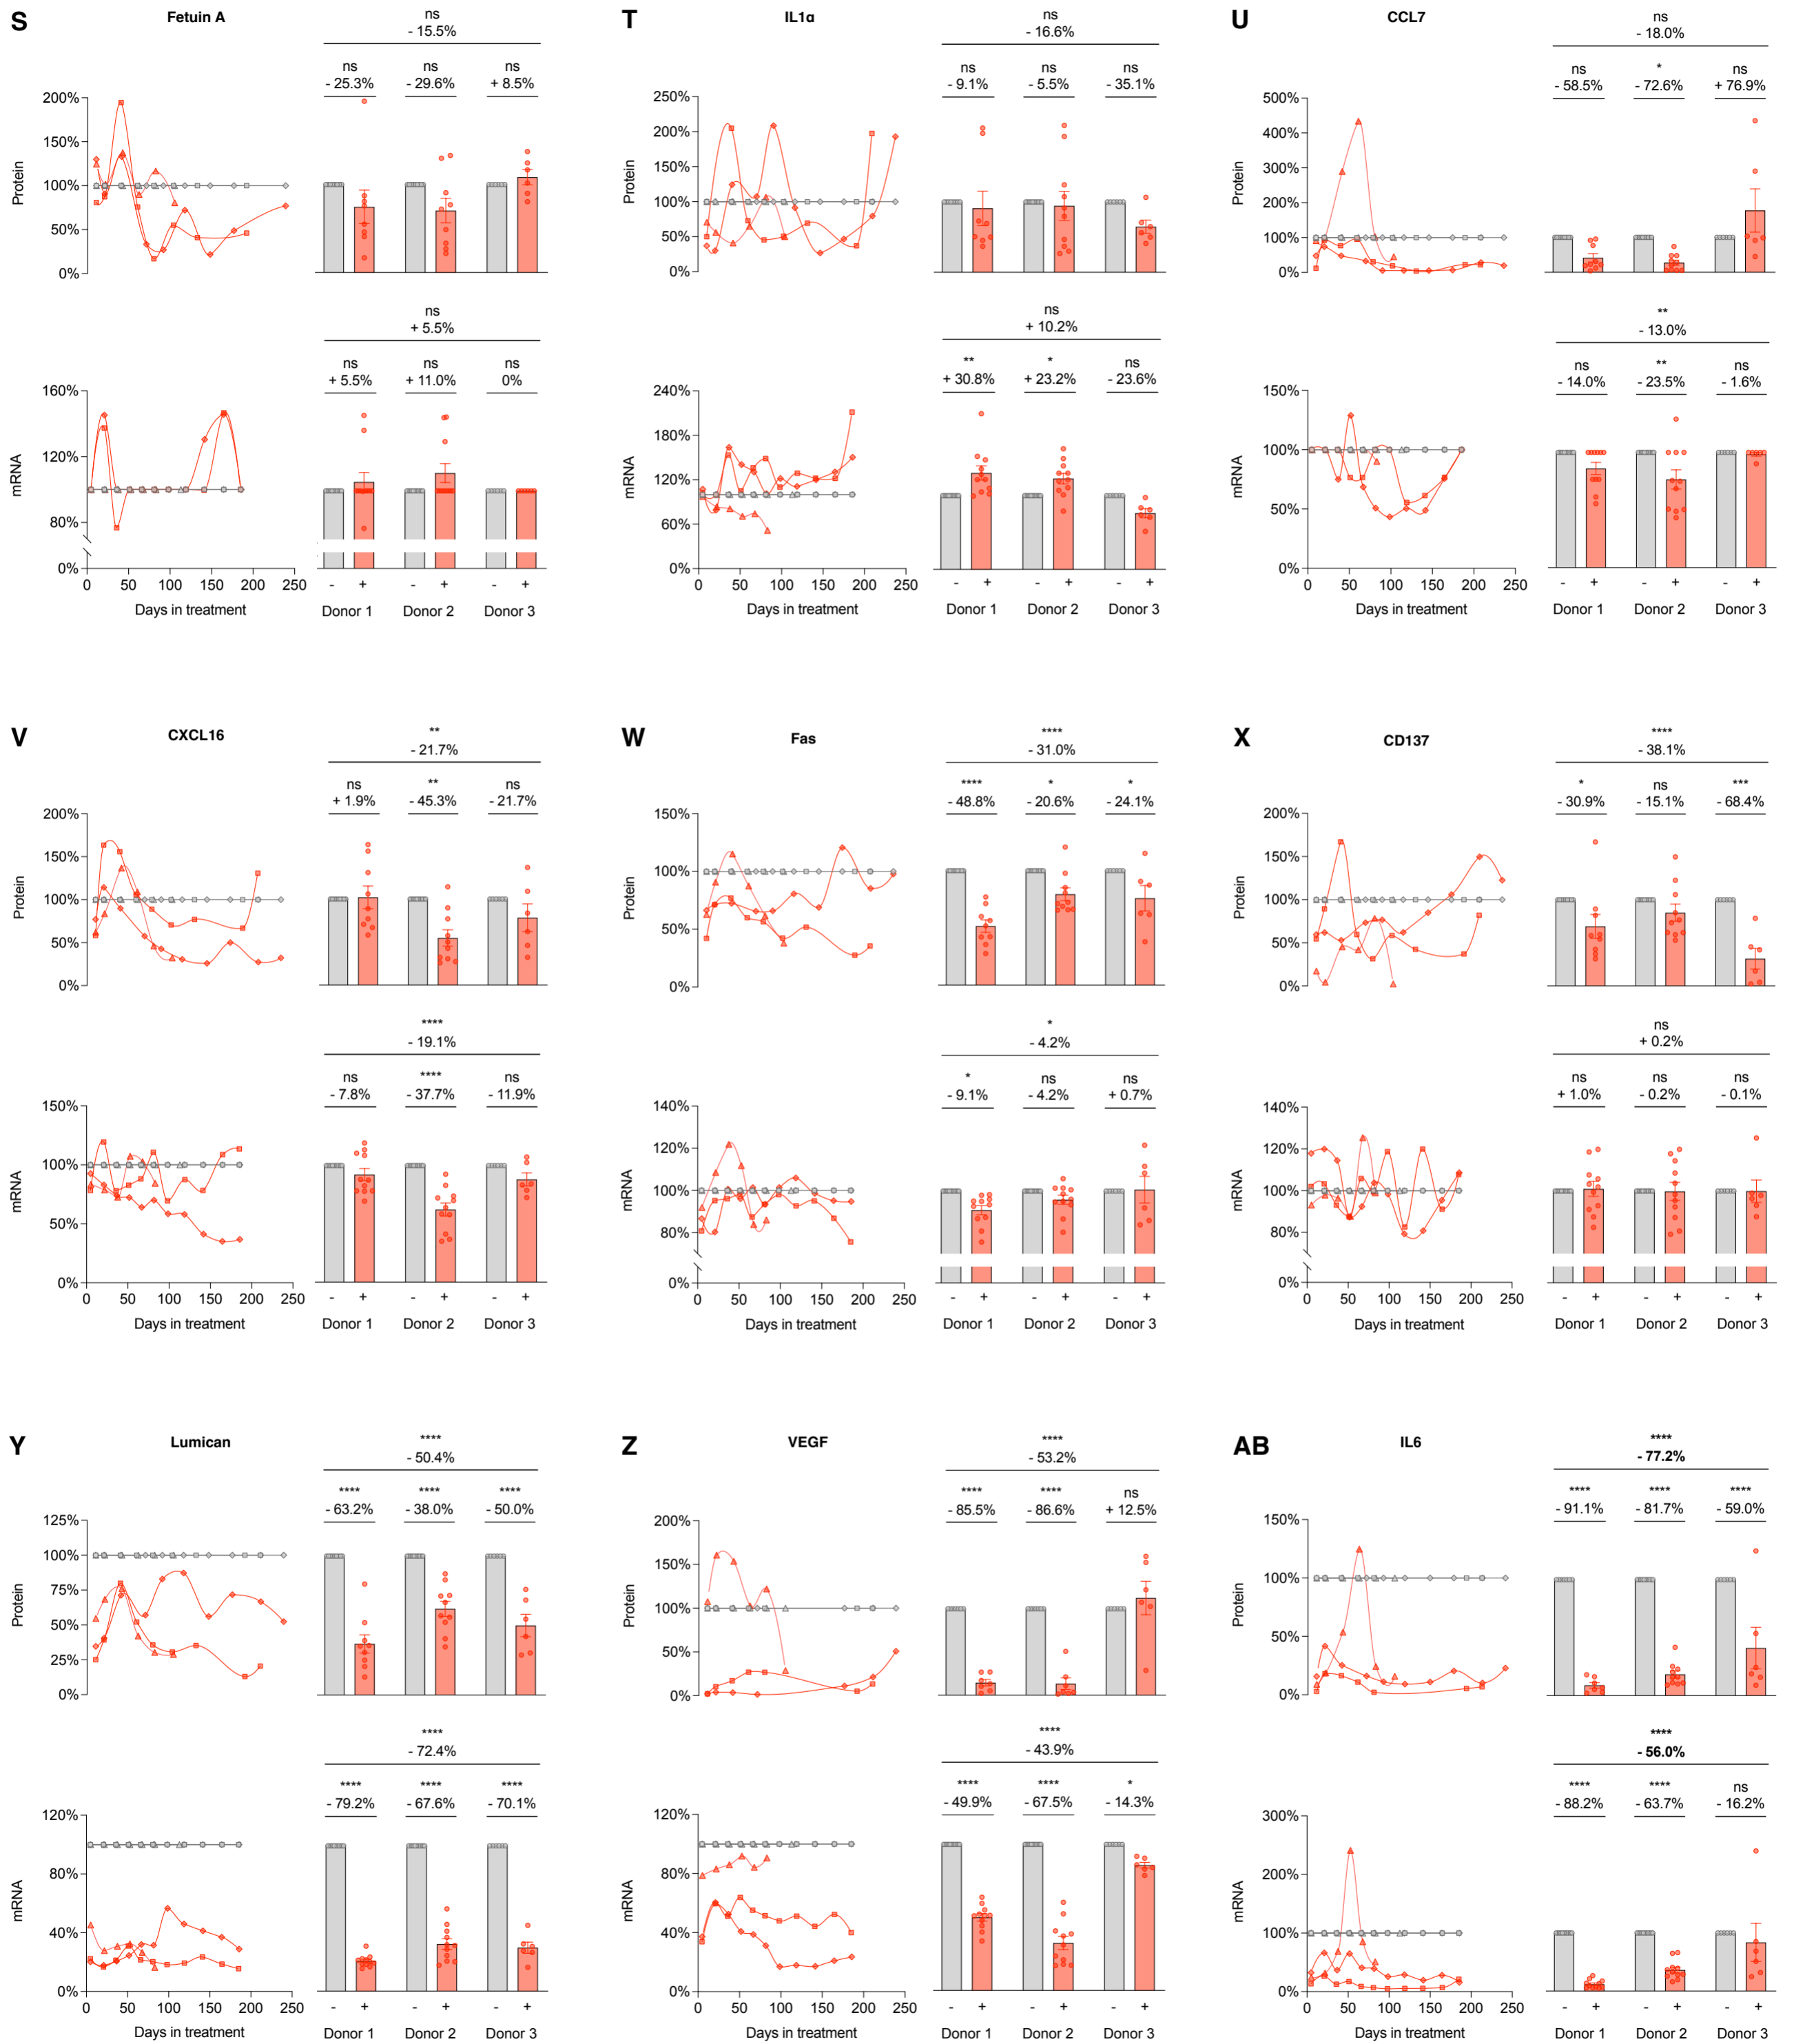

Figure S8

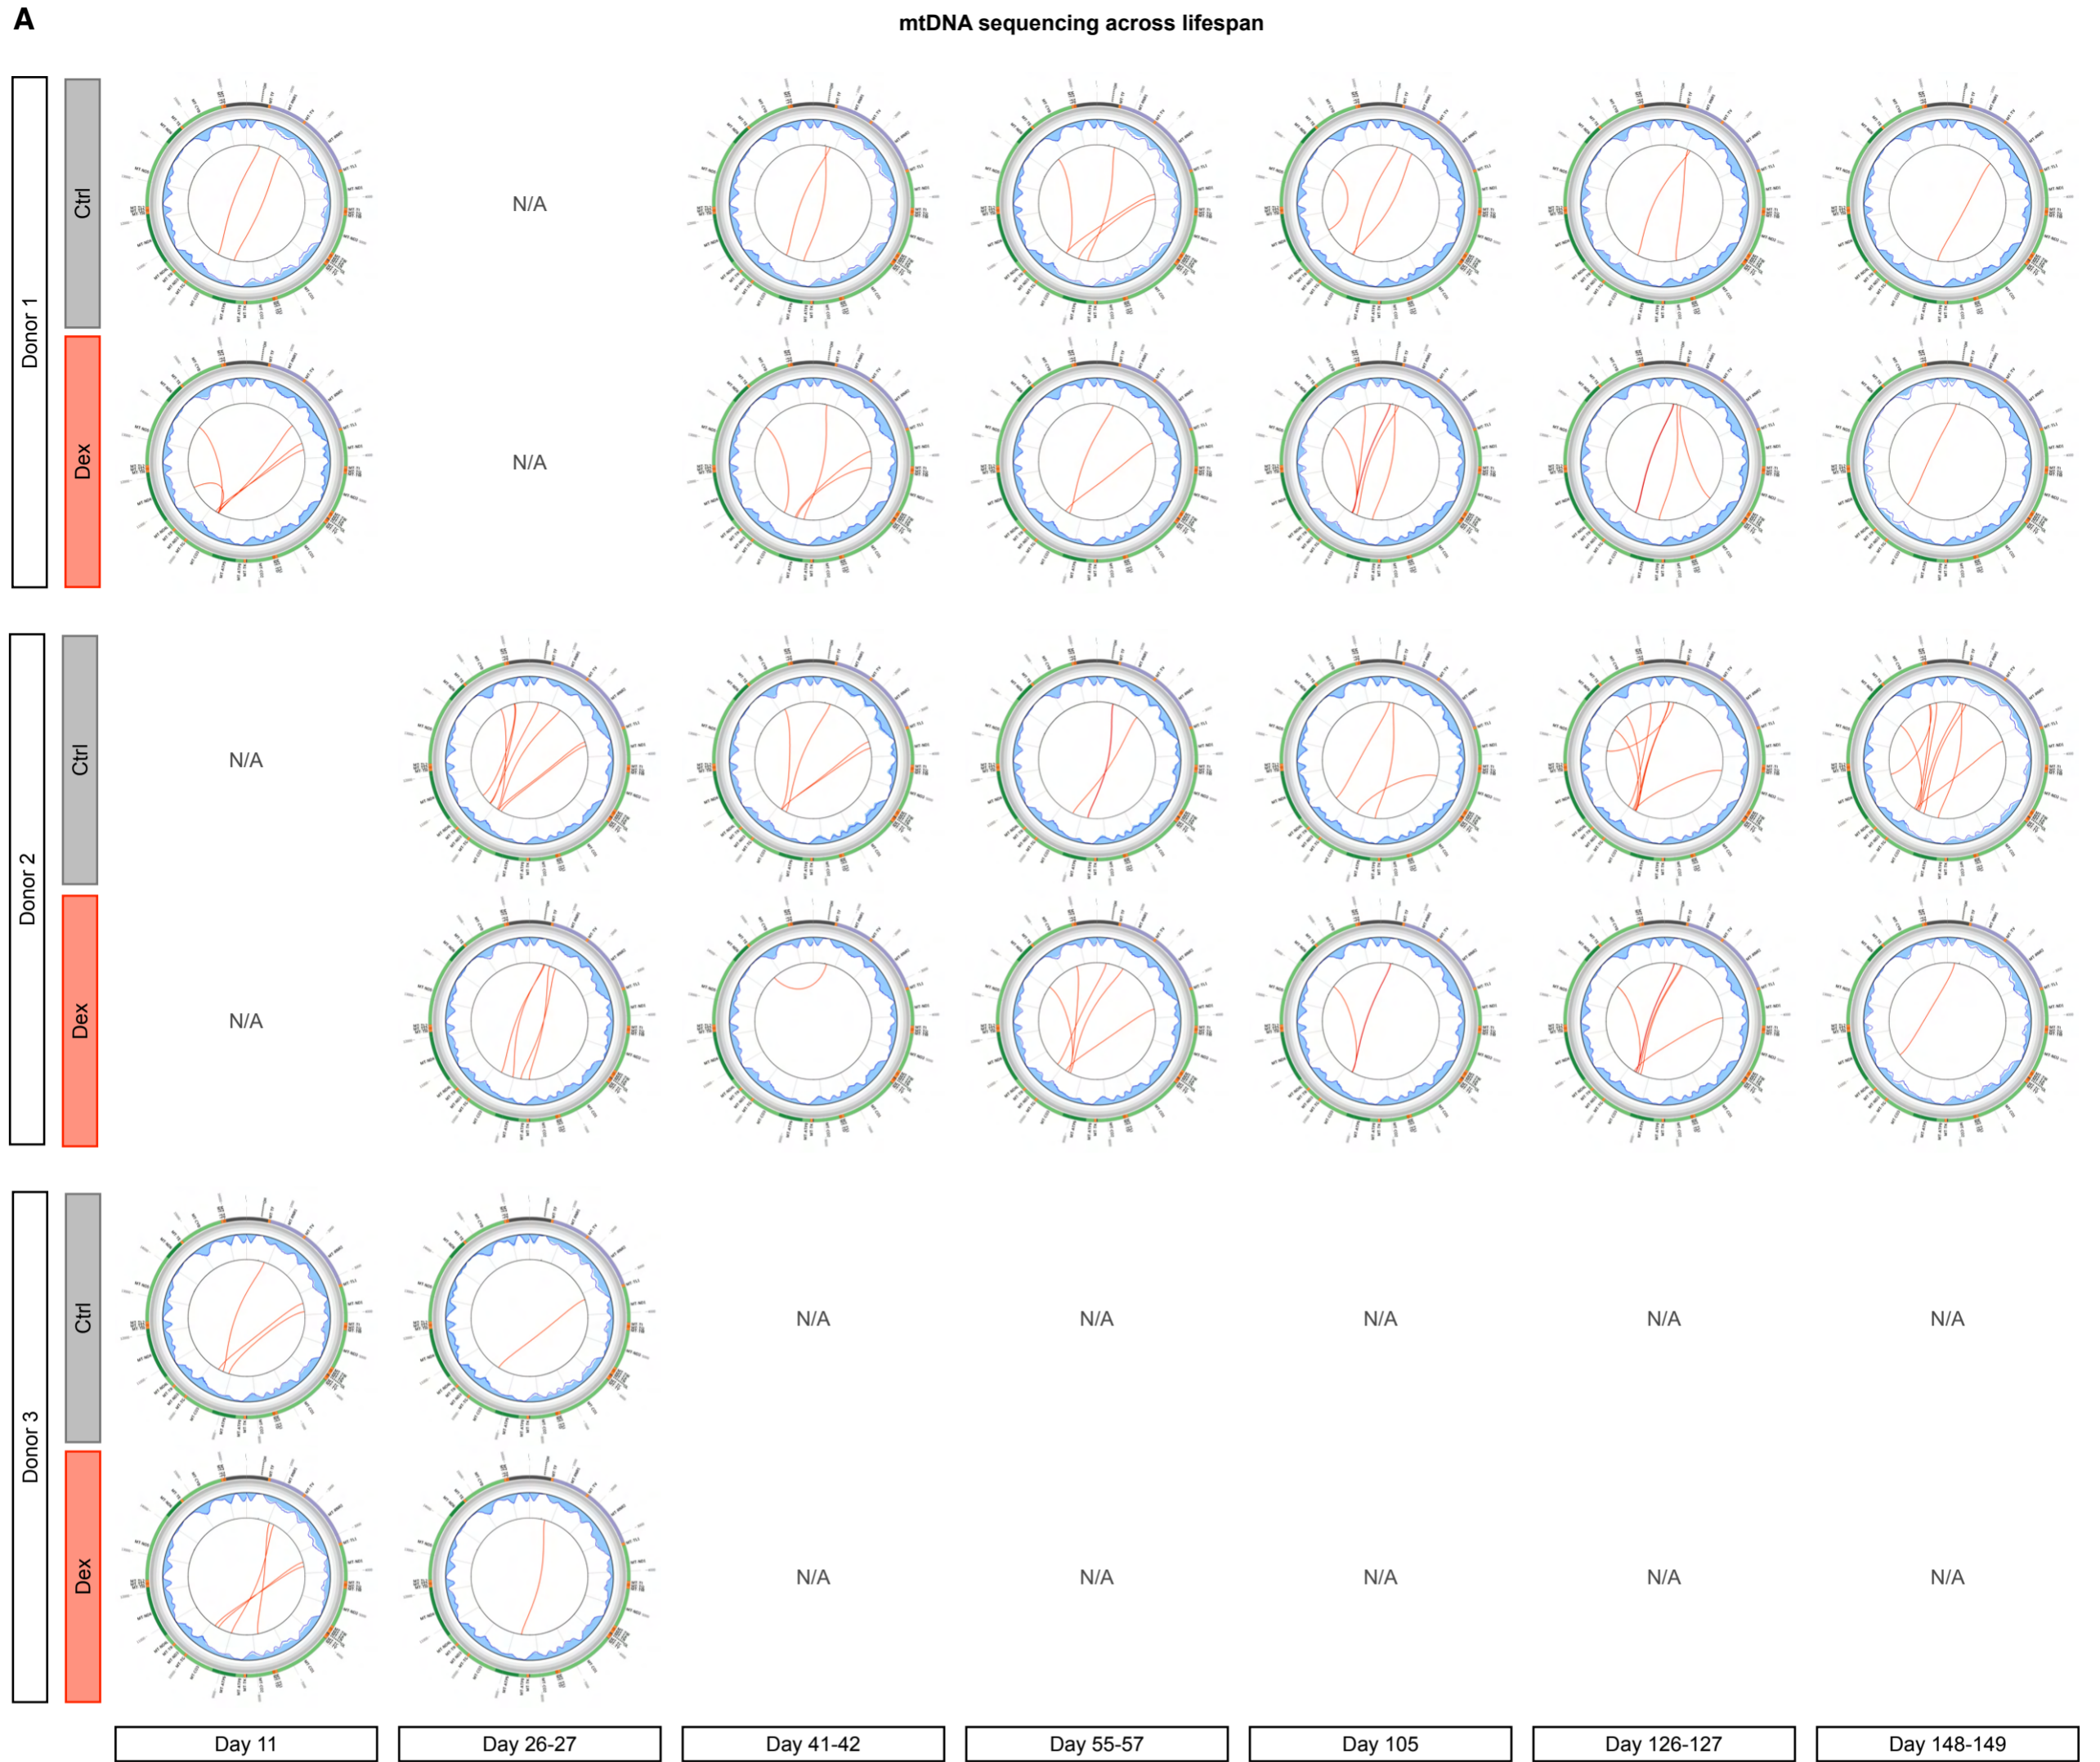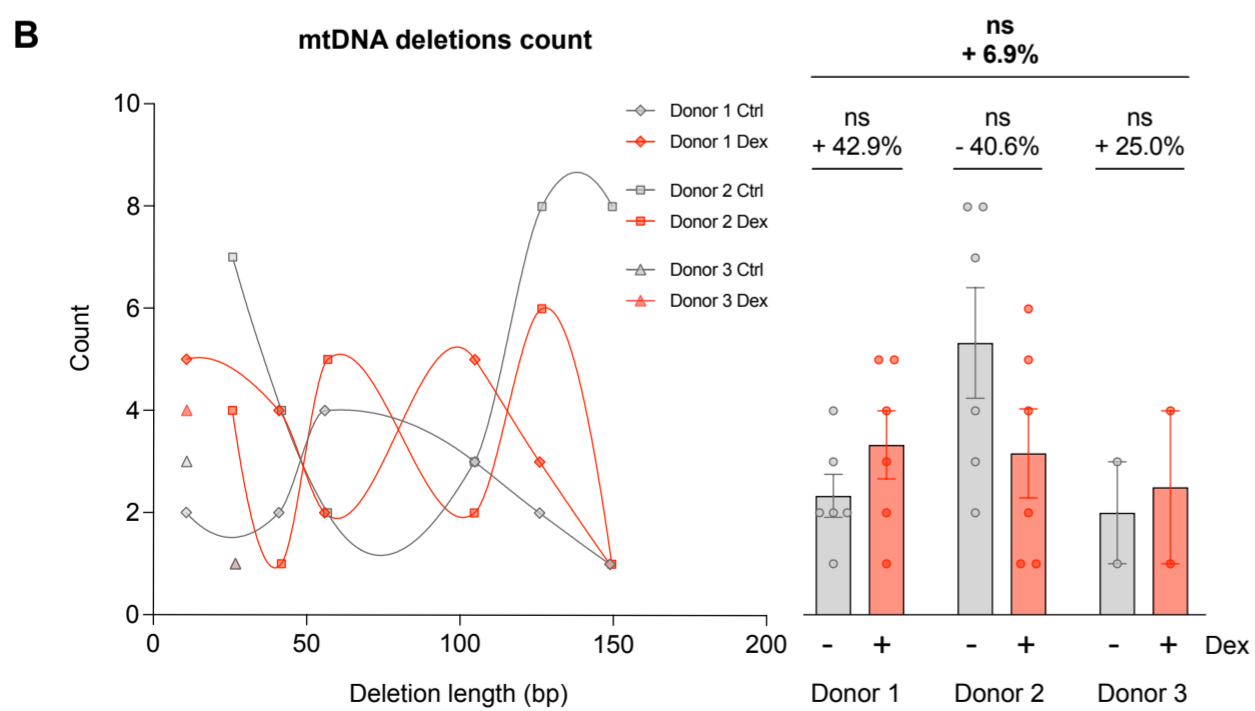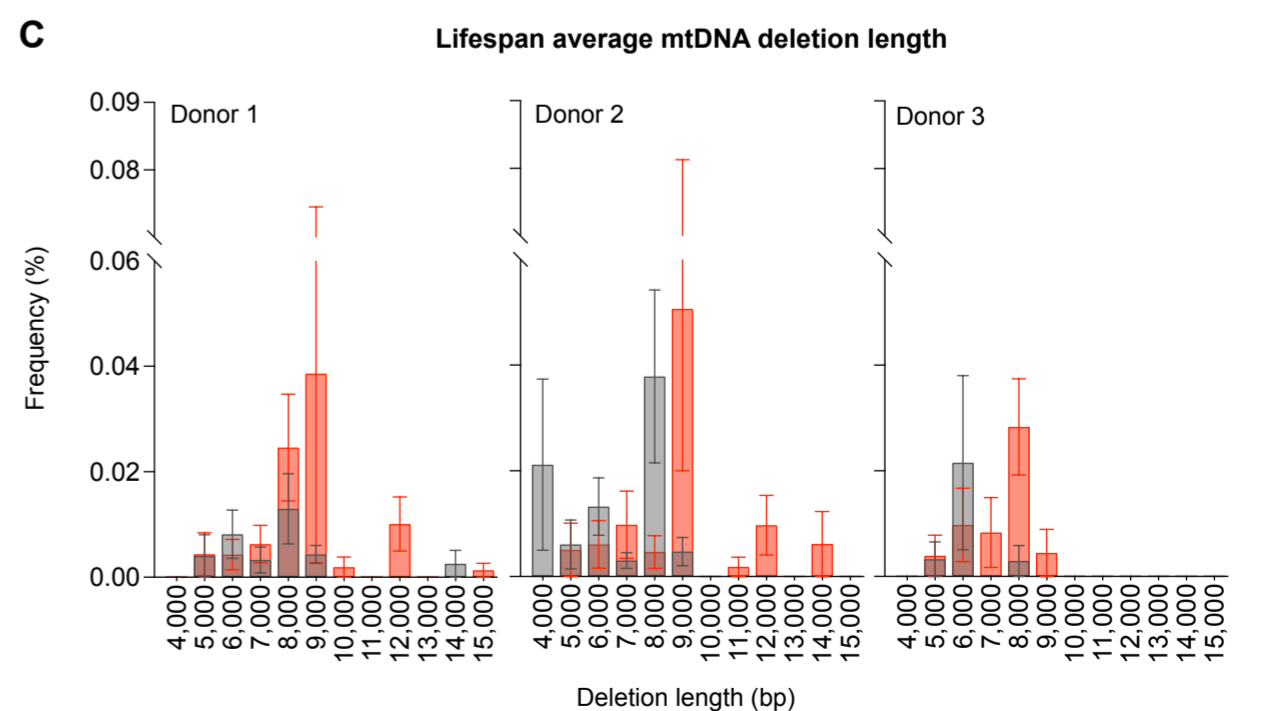

Figure S8 - Continued (2/2)

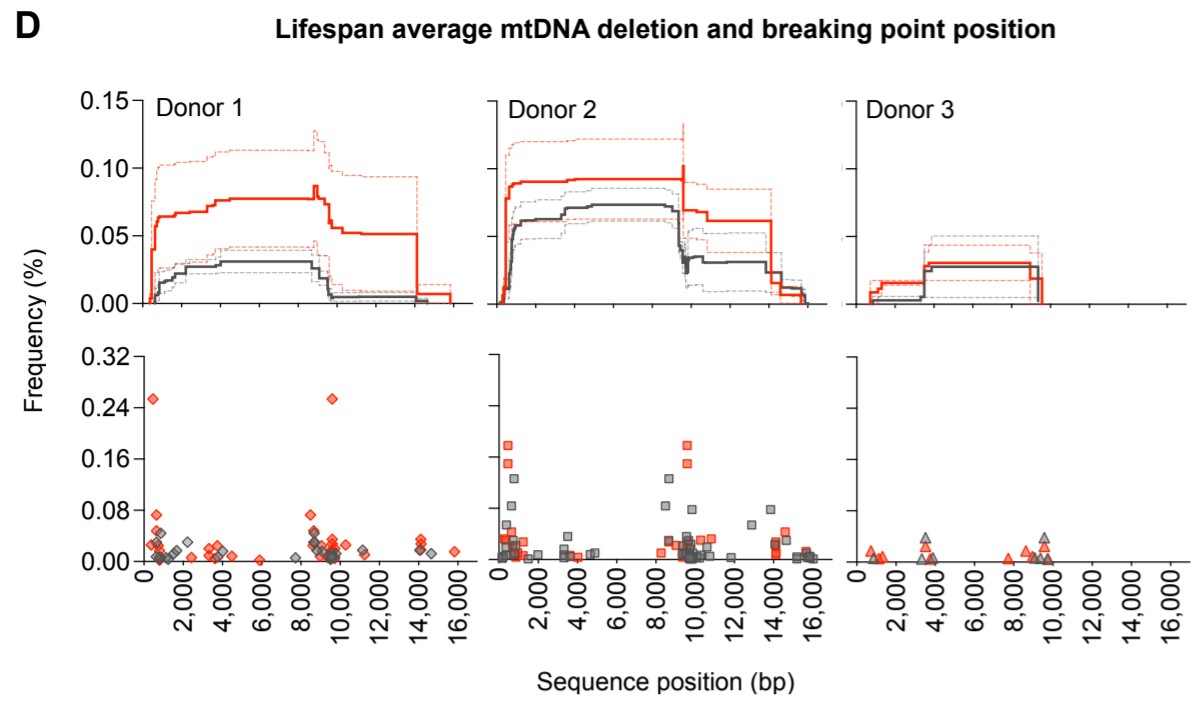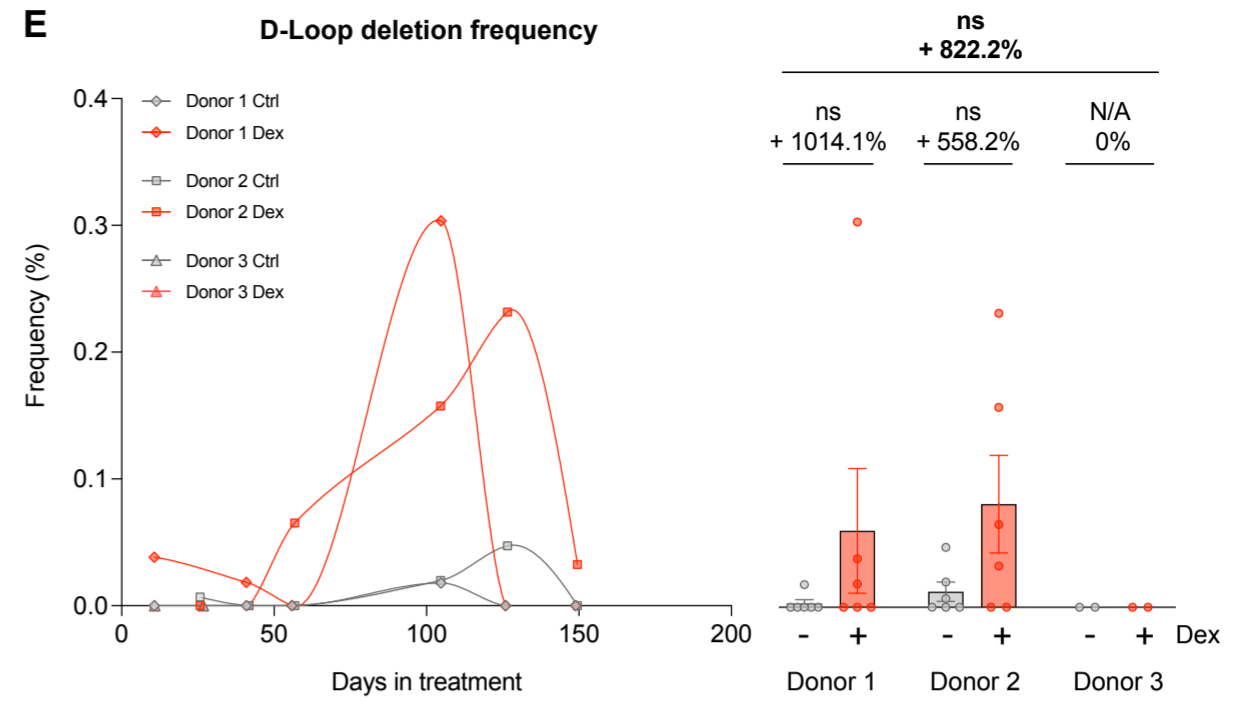

Figure S9

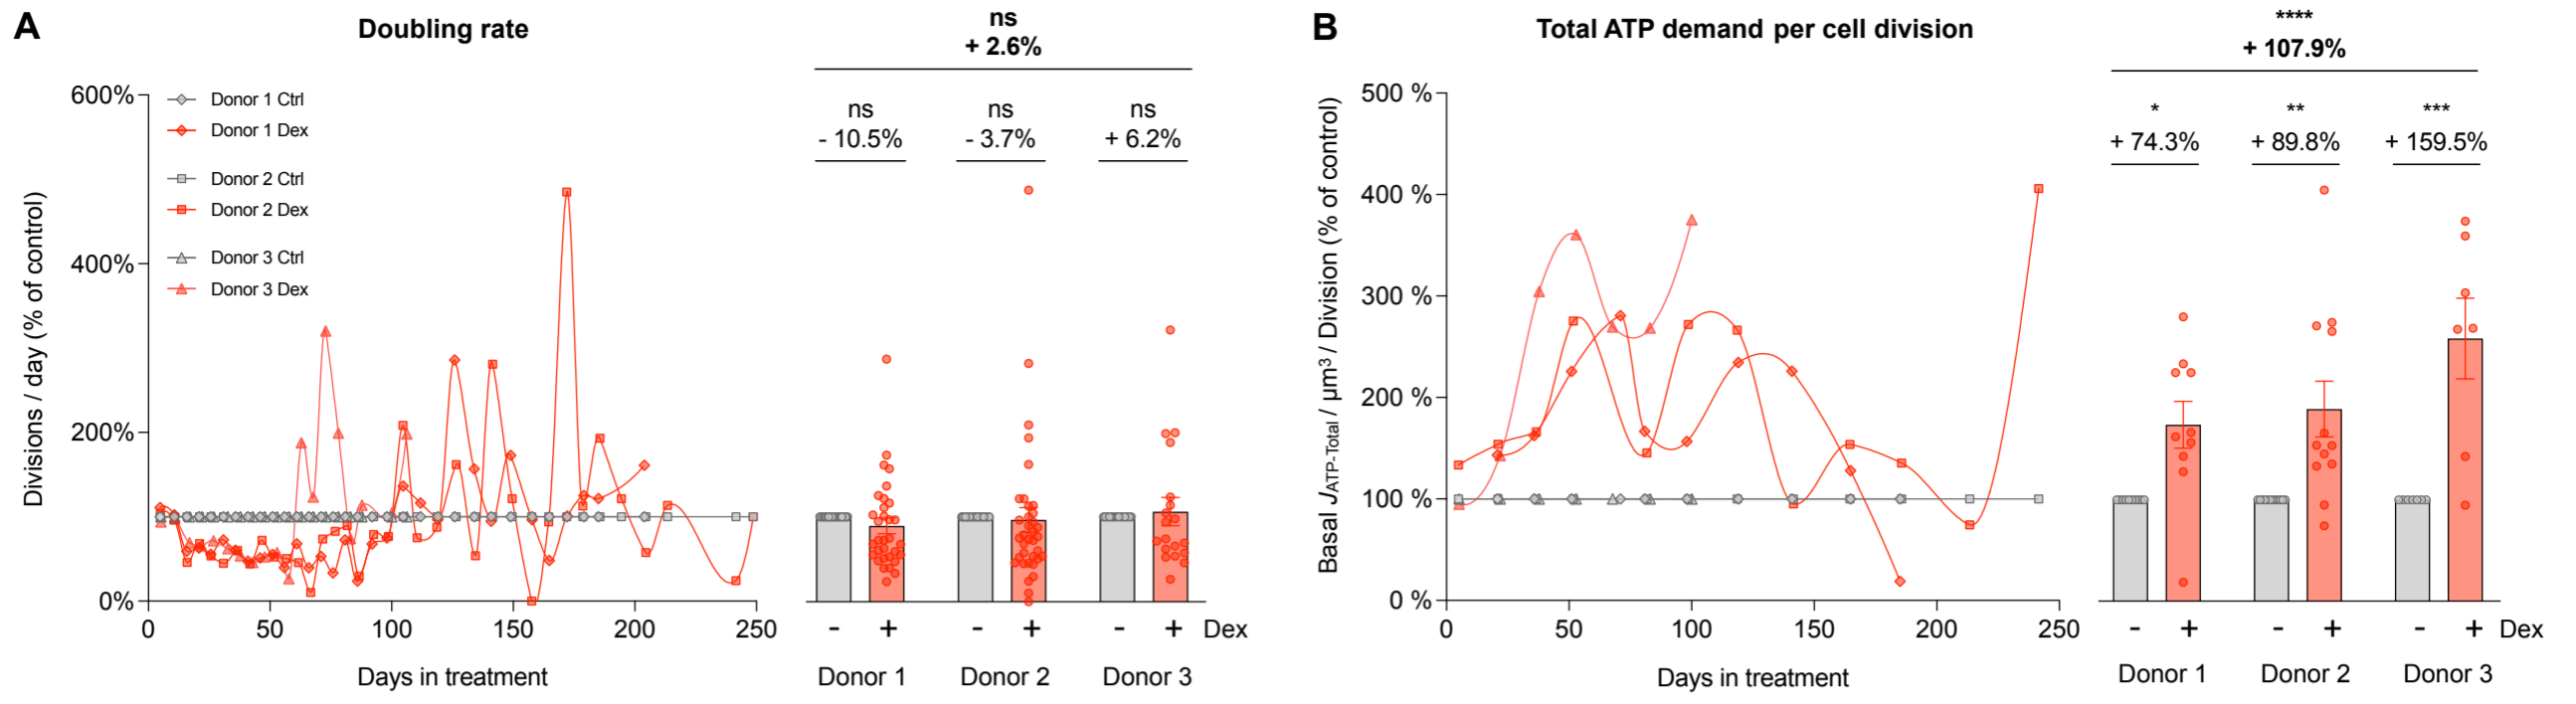

Figure S10

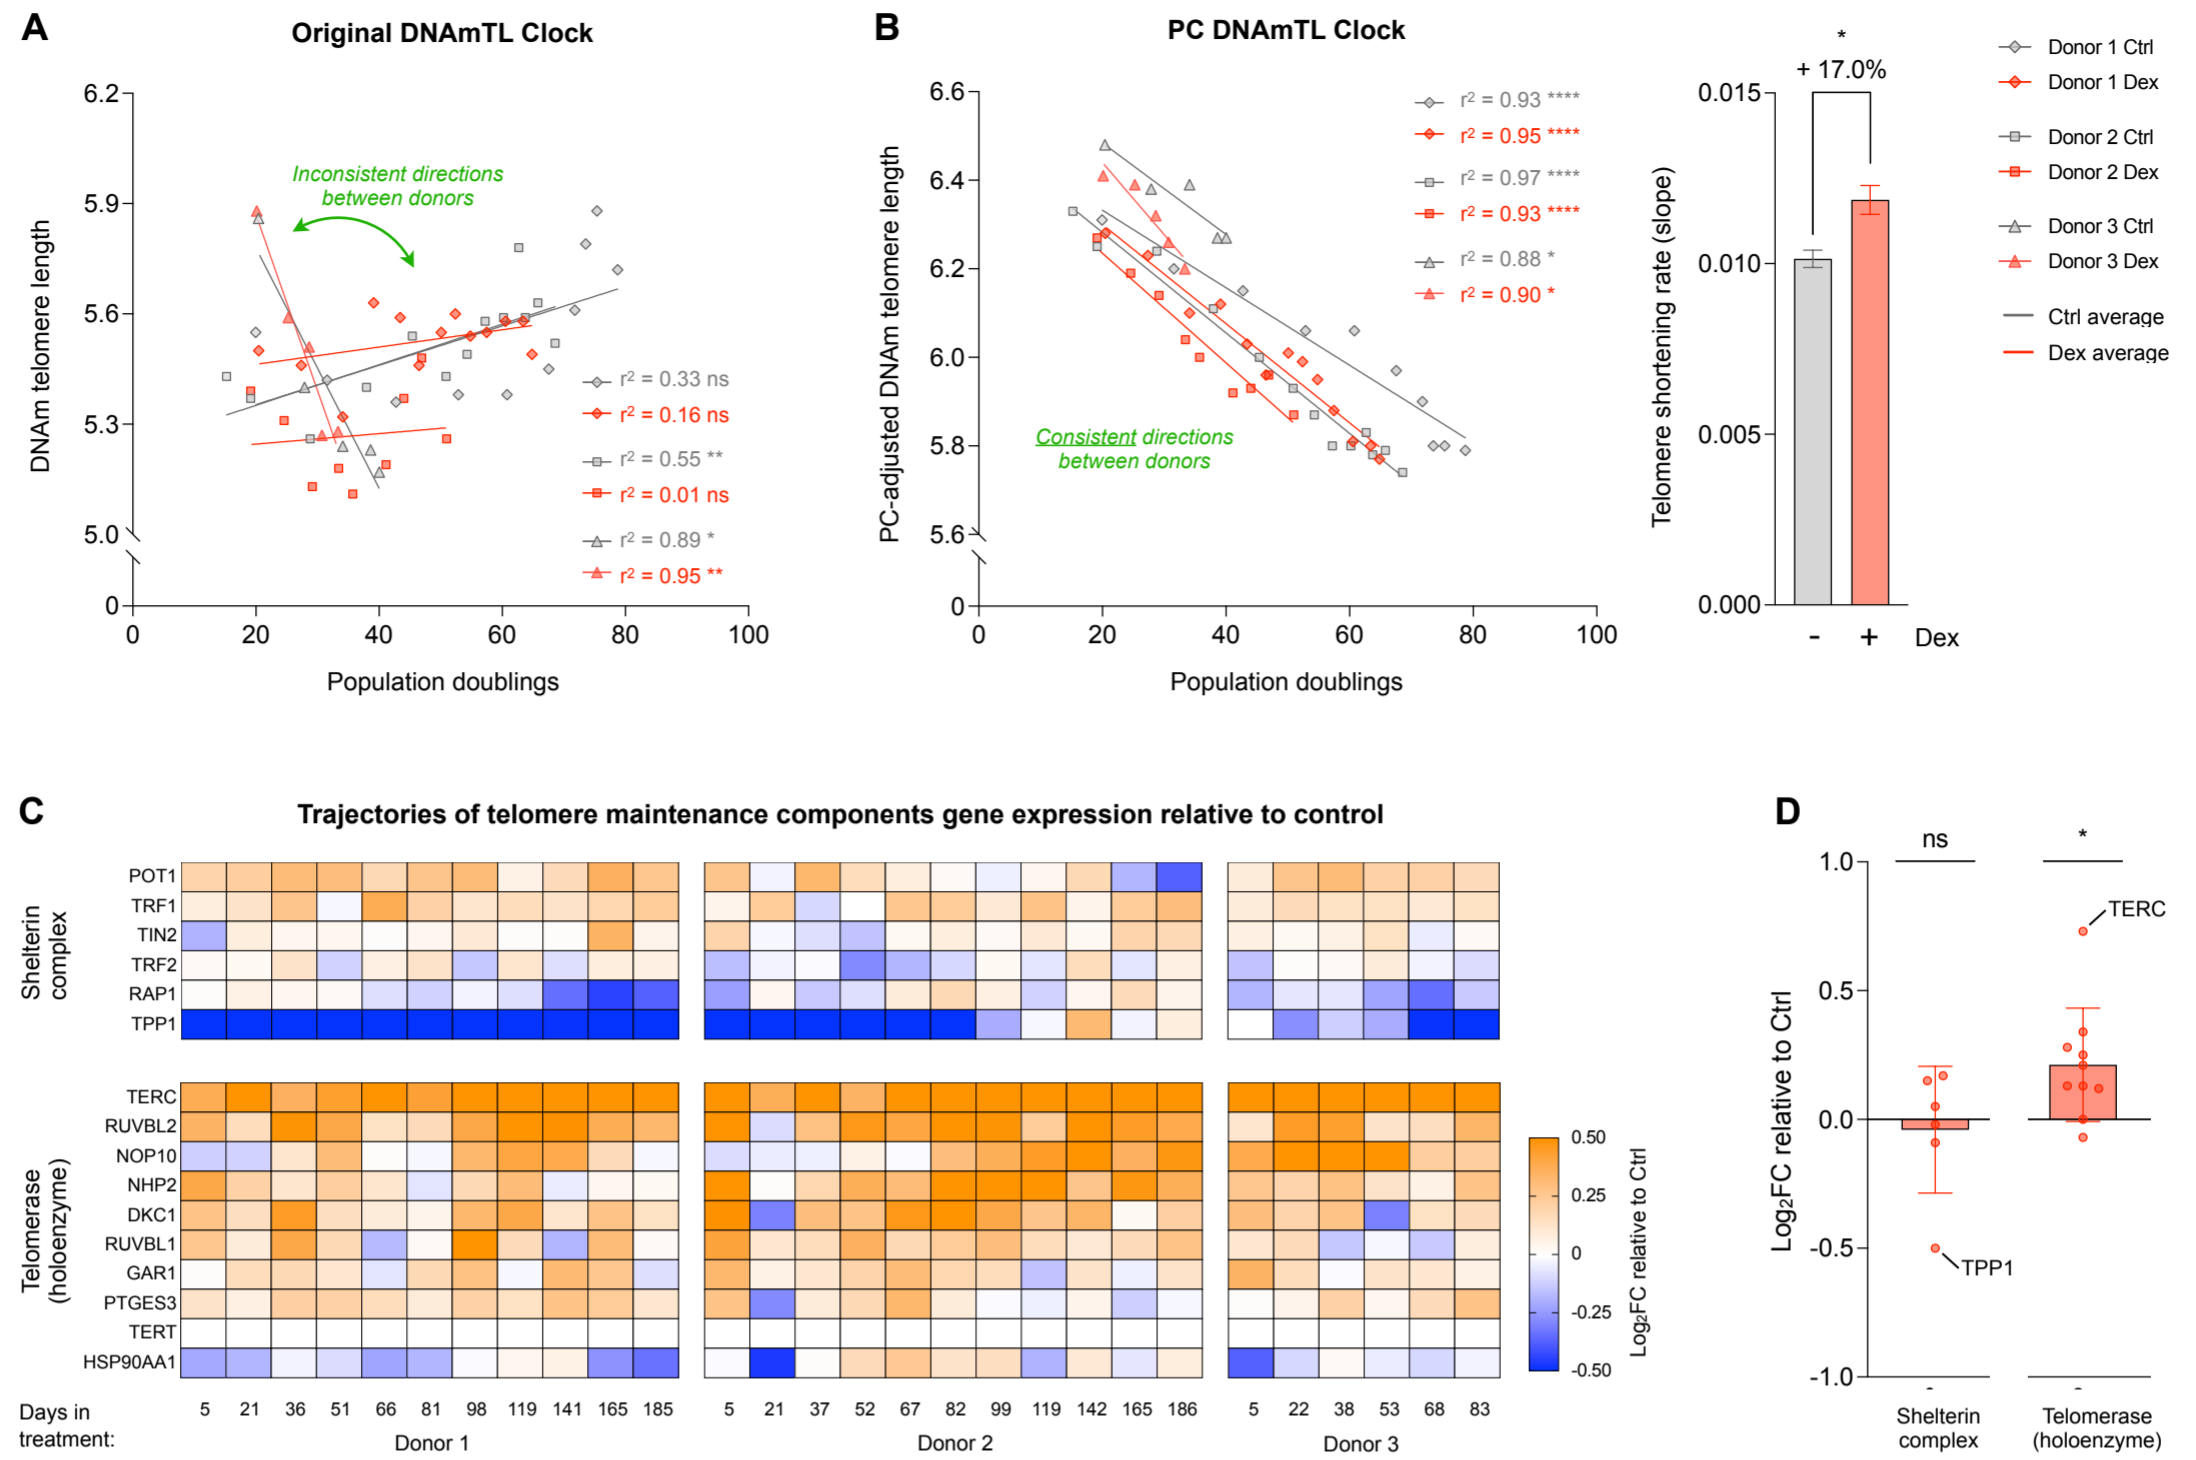

Figure S11

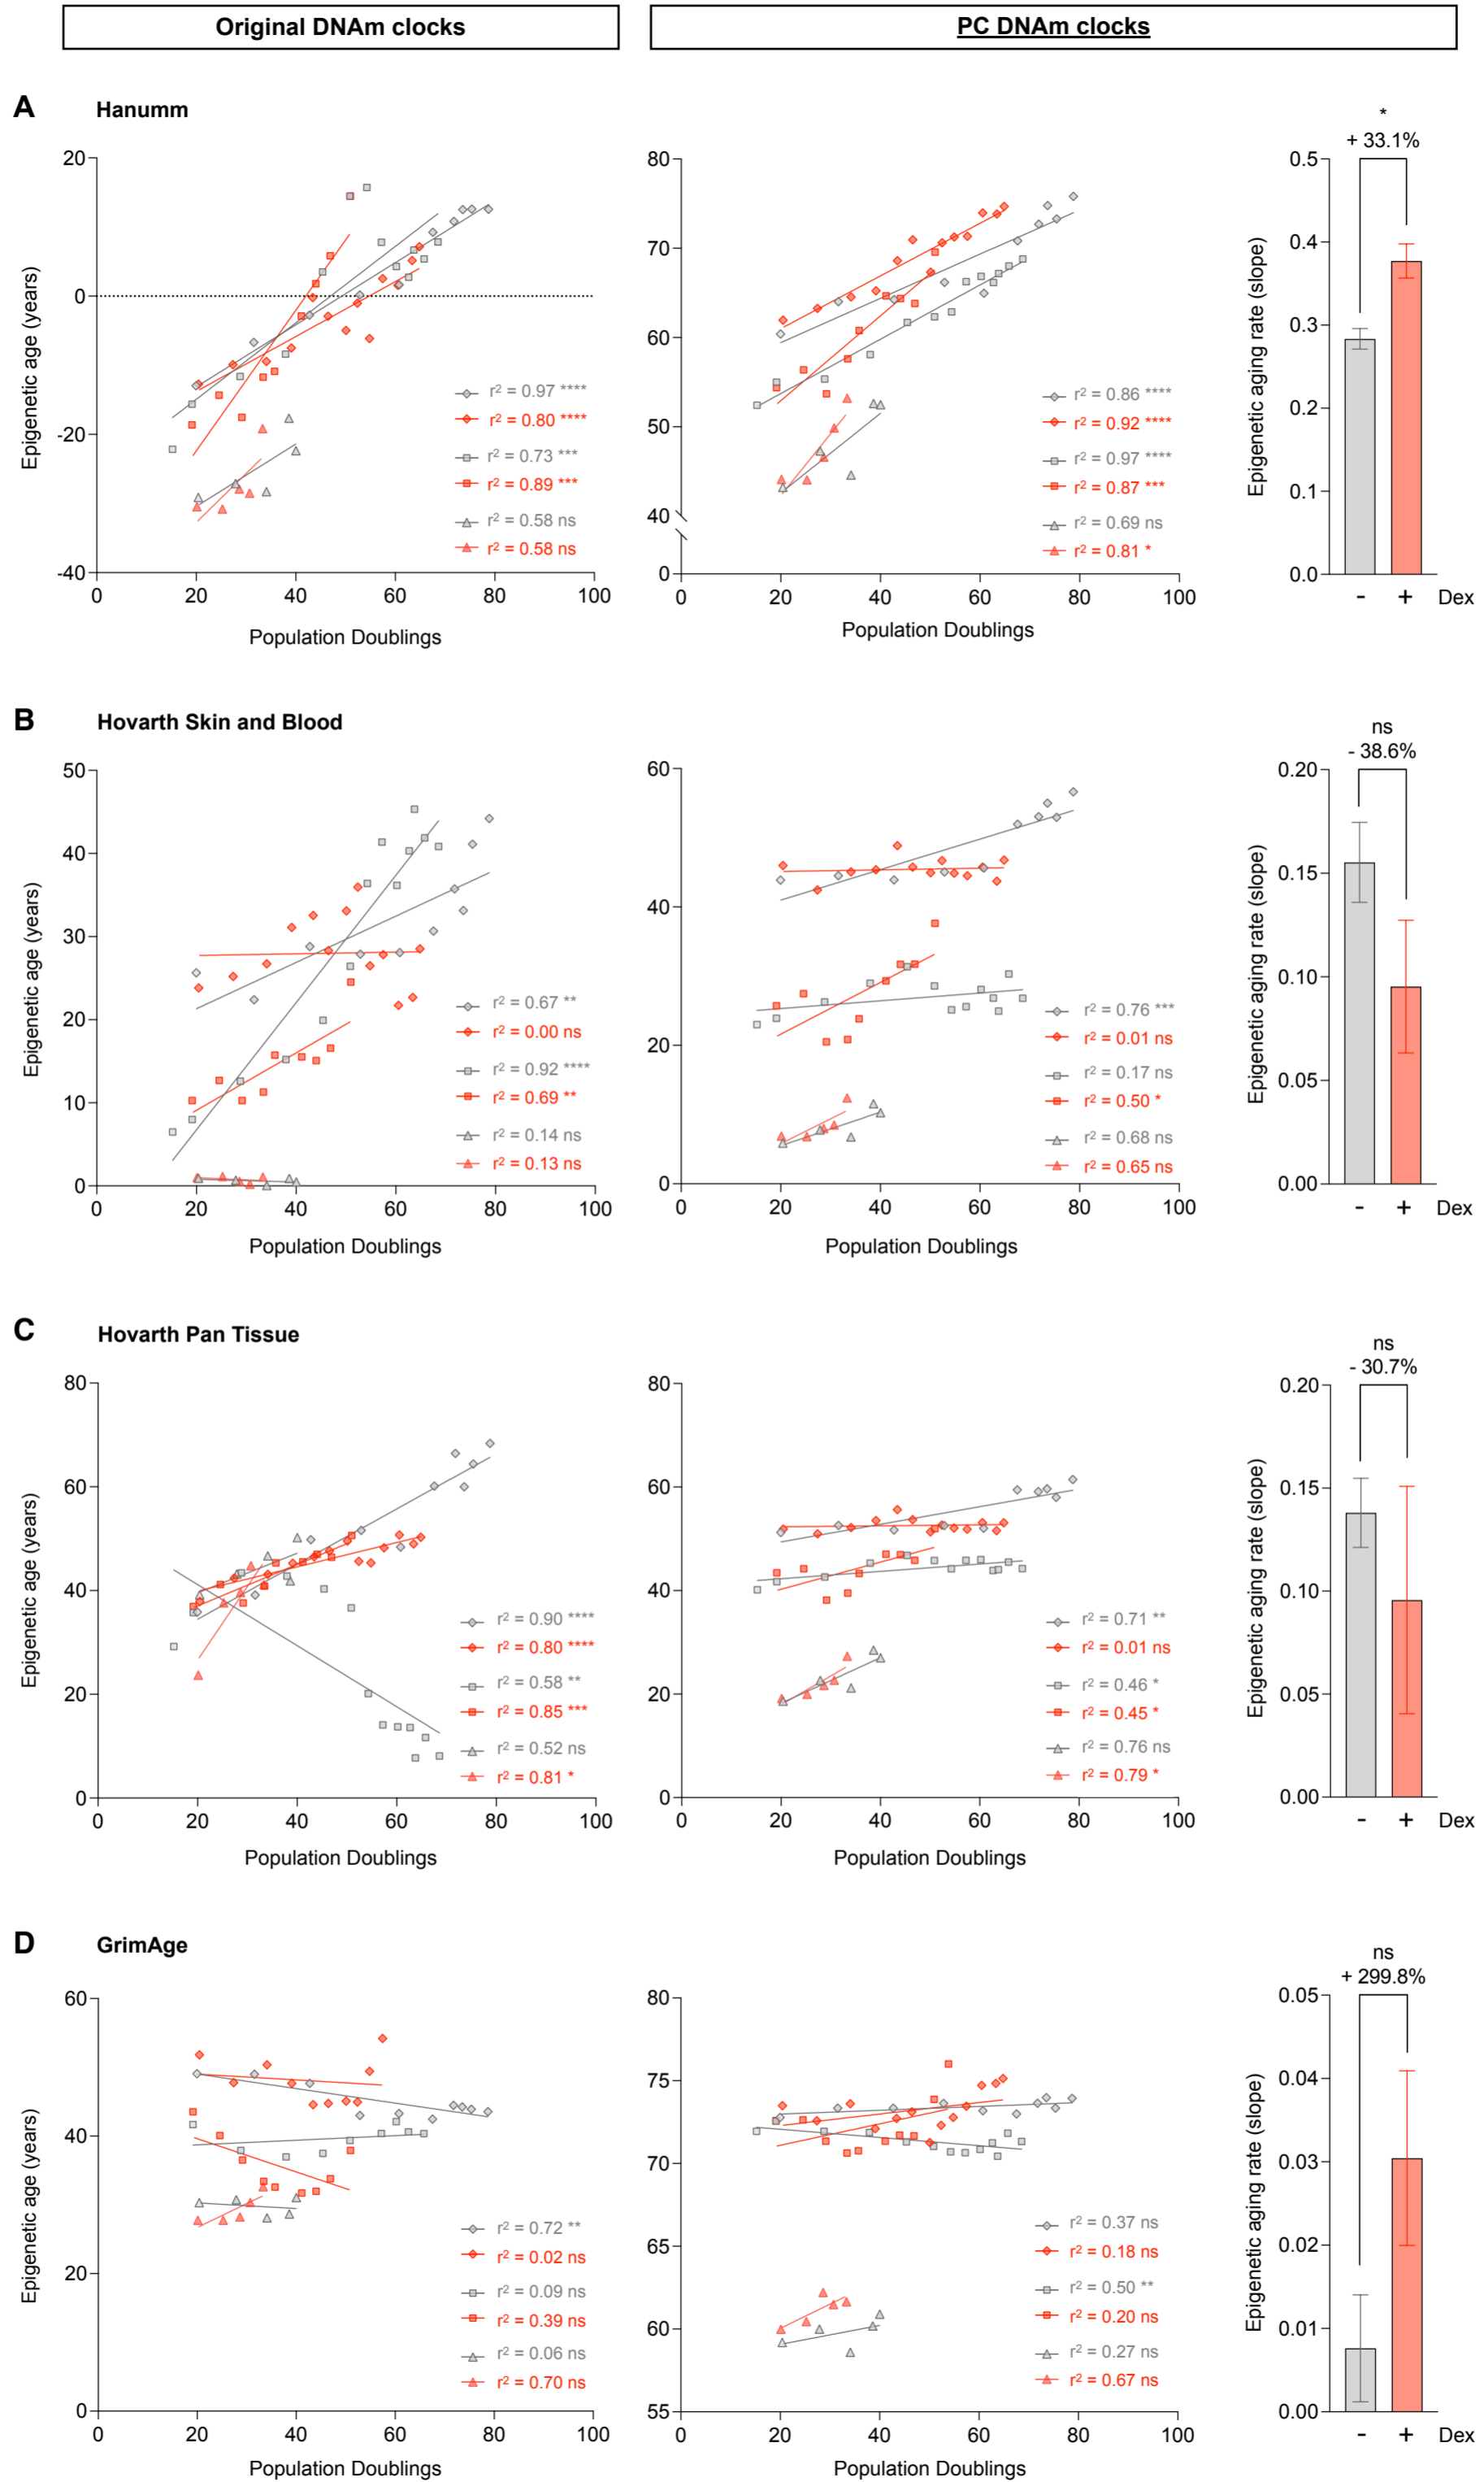

Figure S12

**A** Mitochondrial Nutrient Uptake Inhibitors (mitoNUTIs)

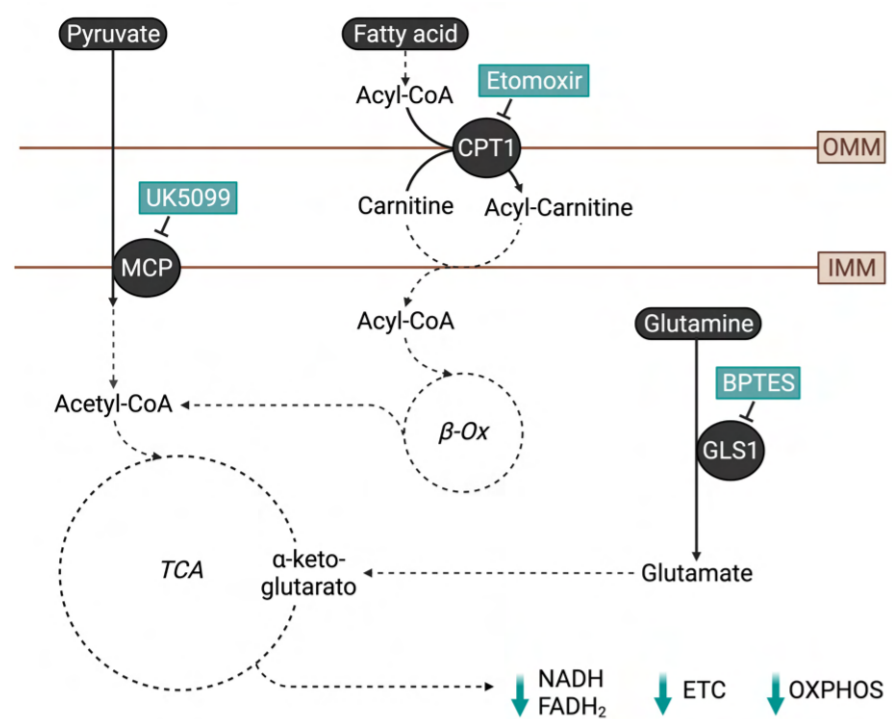

**B** ATP derived from OxPhos

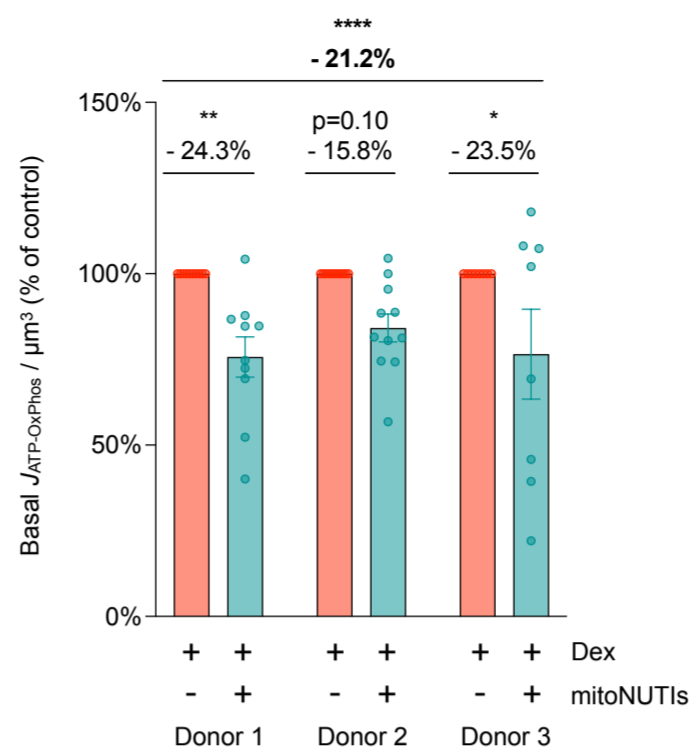

**C** ATP derived from Glycolysis

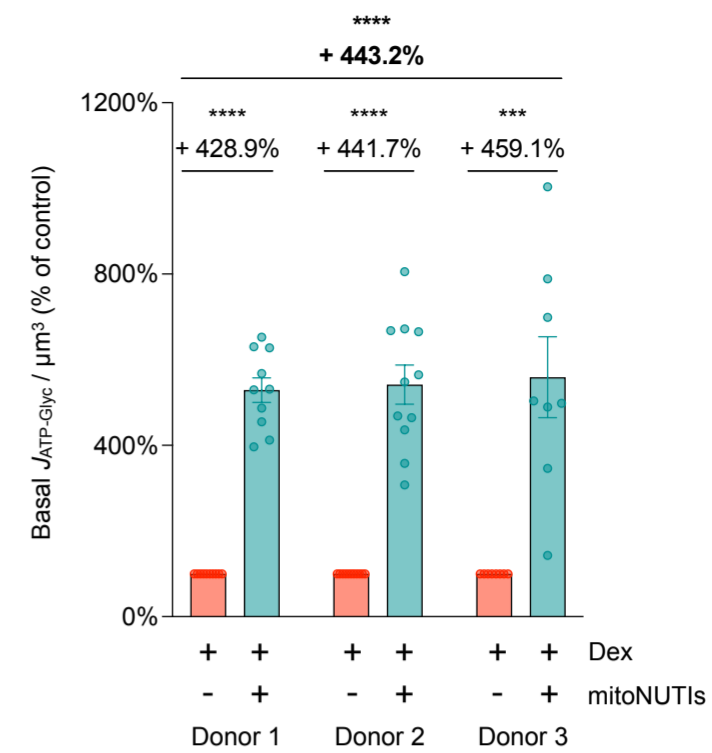

Supplement: NIHMS1912434-supplement-MMC1.pdf [file NIHMS1912434-supplement-MMC1.pdf]
